1 **TReSR: A PCR-compatible DNA sequence design method for engineering proteins containing**  
2 **tandem repeats**

3 James A Davey\* & Natalie K Goto\*

4 Department of Chemistry and Biomolecular Sciences, University of Ottawa, 10 Marie-Curie, Ottawa  
5 Ontario, K1N 6N5, Canada

6 \* Correspondence to JAD: jamesa\_davey@dfci.harvard.edu & NKG: natalie.goto@uottawa.ca

7

8 **ABSTRACT.** Protein tandem repeats (TRs) are motifs comprised of near-identical contiguous sequence  
9 duplications. They are found in approximately 14% of all proteins and are implicated in diverse biological  
10 functions facilitating both structured and disordered protein-protein and protein-DNA interactions. These  
11 functionalities make protein TR domains an attractive component for the modular design of protein  
12 constructs. However, the repetitive nature of DNA sequences encoding TR motifs complicates their  
13 synthesis and mutagenesis by traditional molecular biology workflows commonly employed by protein  
14 engineers and synthetic biologists. To address this challenge, we developed a computational protocol to  
15 significantly reduce the complementarity of DNA sequences encoding TRs called TReSR (for Tandem  
16 Repeat DNA Sequence Redesign). The utility of TReSR was demonstrated by constructing a novel  
17 constitutive repressor synthesized by duplicating the LacI DNA binding domain into a single-chain TR  
18 construct by assembly PCR. Repressor function was evaluated by expression of a fluorescent reporter  
19 delivered on a single plasmid encoding a three-component genetic circuit. The successful application of  
20 TReSR to construct a novel TR-containing repressor with a DNA sequence that is amenable to PCR-based  
21 construction and manipulation will enable the incorporation of a wide range of TR-containing proteins for  
22 protein engineering and synthetic biology applications.

23

24 **INTRODUCTION**

25 The ability to rapidly construct, evaluate, and sequence libraries of protein variants is essential to the  
26 workflow employed by protein engineers and synthetic biologists who strive to create proteins and genetic  
27 circuits with new and improved properties and functions [1, 2]. A useful category of biomacromolecular  
28 components can be derived from tandem repeat (TR) amino acid sequence motifs found in approximately

29 14% of all proteins [3] facilitating an array of both structured and disordered protein-protein and protein-  
30 nucleic acid interactions [4, 5]. TR sequence motifs encompass a number of modular protein components,  
31 including smaller intra-domain motifs forming fibrous structures (e.g., collagen and  $\alpha$ -helical coiled-coils) [6,  
32 7], intermediate sized motifs (e.g., WD40, leucine-rich, armadillo, ankyrin, Kelch, and HEAT repeat  
33 domains) forming elongated solenoid and closed toroid structures [8–13], in addition to larger bead-on-a-  
34 string multi-domain motifs [14]. Despite their utility and abundance, TR sequence motifs remain unexploited  
35 as a class of modular components for the purposes of protein and genetic circuit engineering precisely  
36 because they are encoded by repetitive DNA sequences that prohibit the routine application of PCR-based  
37 molecular biology techniques [15–18].

38  
39 Although it is possible to synthesize TR sequences by full-length gene synthesis, the downstream PCR-  
40 based manipulations that are routinely employed in protein engineering and synthetic biology workflows will  
41 be complicated by the presence of repetitive DNA sequences in these constructs. To circumvent this short-  
42 coming, the degenerate nature of DNA codons encoding the canonical amino acids (with the exception of  
43 Trp and Met) can be exploited to construct a TR protein encoded by a gene designed to have reduced DNA  
44 sequence complementarity, thereby rendering it compatible with downstream PCR-based manipulations.  
45 Furthermore, this DNA design strategy should also make it possible to employ the assembly polymerase  
46 chain reaction (aPCR) to construct TR-encoding genes more cost-effectively than full-length gene  
47 synthesis, since aPCR utilizes oligonucleotide primers as the only template-donating reagent in the reaction  
48 [16]. However, the task of redesigning a TR DNA sequence to make it suitable for aPCR is not trivial, as  
49 the probability of generating misassembled products increases with the number of primers used in the  
50 reaction. Consequently, aPCR approaches in gene synthesis are limited to DNA sequences that have  
51 relatively low complementarity between non-overlapping segments of primers.

52  
53 To create a TR-encoding DNA sequence that would be amenable to both aPCR synthesis and PCR-based  
54 mutagenesis, we have devised a DNA sequence redesign strategy called TReSR (for **T**andem **R**epeat DNA  
55 **S**equences **R**edesign) to introduce silent mutations that would allow for gene construction by aPCR while  
56 preserving the amino acid identity of the translated TR construct (Fig 1). To test this methodology, we

57 designed a novel 178 amino acid residue bead-on-a-string TR protein containing a duplication of the N-  
58 terminal DNA binding domain (DBD) of the bacterial repressor LacI [19, 20], a construct that has the  
59 potential to expand the toolbox of DNA-binding proteins for synthetic biology applications. Application of  
60 TReSR allowed for the design of a TR-encoding DNA template having reduced sequence identity (66%)  
61 compared to an initial 100% sequence identity between targeted regions of the TRs. This reduction in  
62 sequence complementarity enabled synthesis of the full DNA sequence by aPCR and splicing by overlap  
63 extension (SOE) [18]. This template was also compatible with PCR-based site-directed mutagenesis, which  
64 was used to introduce domain selective triple-mutations designed to specifically bind a variant of the *lac*  
65 operator or abolish its DNA-binding activity [21].

66

67 **Fig 1. Overview of the TR DNA sequence redesign strategy implemented in TReSR.**

68 The design strategy presented in this study is schematically outlined for the construction of a TR containing  
69 two identical 20 amino acid segments from the N-terminus of the LacI repressor. (A) The TReSR protocol  
70 is initiated by dissection of the 20-amino acid target sequence into contiguous 5-residue segments (labelled  
71 with upper-case roman numerals) for DNA sequence redesign. (B) This is followed by the generation of a  
72 sequence list (with individual sequence entries labelled with lower-case roman numerals) constructed from  
73 combinations of synonymous codons that encode the amino acid sequence for each segment. An example  
74 codon combination encoding the amino acid sequence for segment I is shown that uses the codons  
75 highlighted in red. The label for this codon combination is given by a number for each amino acid that  
76 corresponds to the list position for the codon used (e.g., for the sequence shown, the first codon is used for  
77 all amino acids except for the last one which used the 6th codon in the list). Melting temperatures ( $T_m$ ) of  
78 all codon combinations are then calculated using the UNAFold web server<sup>24</sup> to provide a measure of  
79 homodimerization affinities for the forward ( $T_{FF}$ ) and reverse complement ( $T_{RR}$ ) sequences, along with the  
80  $T_m$  of heterodimerization for the forward sequence with its reverse complement ( $T_{FR}$ ) and with the reverse  
81 complement of the wild-type sequence ( $T_{WT}$ ). Sequences are then filtered and discarded based on  
82 computed hybridization metrics (described in detail in the Materials and Methods), favouring codon  
83 combinations that maximize the  $T_m$  of heterodimerization ( $T_{FR}$ ) while minimizing the  $T_m$  of homodimerization  
84 ( $T_{FF}$  and  $T_{RR}$ ) and hybridization with the wild-type sequence ( $T_{WT}$ ). (C) The third step of the TReSR

85 protocol assigns codon combinations to groups according to sequence similarity. All pair-wise percent  
86 sequence identities are calculated (shown as a heat map for codon combinations (i) to (iv)) and used to  
87 identify pairs of codon combinations having high sequence complementarity (e.g., codon combination (i) is  
88 similar to (ii) and (iii), and dissimilar to (iv) – (vi)). These are plotted in an interaction graph of codon  
89 combination space which is shown for the six codon combinations partitioned into four unique clusters  
90 (shaded portions) according to their sequence similarity. (Red arrows indicate codon combinations that  
91 share a high degree of percent identity and would therefore be assigned to the same group, while green  
92 lines indicate codon combinations that are distinct, and consequently assigned to different groups.) (D)  
93 After group assignment, the fourth step involves the assembly of sequences from two adjacent codon  
94 combinations from different groups (shown for codon combinations from orange, purple and blue groups  
95 from interaction graph). Hybridization metrics are calculated for the joined adjacent segments and then the  
96 list of paired codon combinations is filtered (as was done in the second step, B) to eliminate paired  
97 segments which are predicted to have problematic homodimerization behaviours (i.e., high  $T_{FF}$  and  $T_{RR}$ ).  
98 (E) The TReSR algorithm is concluded following a depth-first-search of remaining adjacent codon  
99 combinations to identify sequence paths joining contiguous segments. An example TR sequence path is  
100 shown with adjacent segment codon combination pairs connected by green arrows for the first domain and  
101 continued with red arrows for the path encoding the second domain. A randomly selected sequence  
102 resulting from an assembled path is then evaluated as described in the Materials and Methods to confirm  
103 that the DNA sequence would be suitable for aPCR construction of the target gene.

104

105 The function of the designed repressor was evaluated using a three-component genetic circuit where  
106 expression of enhanced green fluorescent protein (eGFP) could be inhibited by expression of our TR  
107 repressor construct binding to a unique operator element incorporated in the reporter protein promoter  
108 sequence. Measurement of density-normalized culture fluorescence in the absence or presence of an  
109 expression-inducing agent for repressor expression demonstrated that only those repressor constructs  
110 containing a functional DNA binding sequence in both DBDs could repress expression of eGFP. This  
111 genetic circuit was also used to demonstrate that a 19-residue C-terminal truncation of the duplicated DBD,  
112 corresponding to the linker helix hinge of LacI (residues 61–89) also served as a functional repressor [22,

113 23]. These results demonstrate the utility of TReSR to manipulate DNA sequence components encoding  
114 TRs and create a new DNA binding module that can be used as a repressor in a genetic circuit.

115

## 116 **MATERIALS AND METHODS**

117 **Calculation and design of the tandem repeat DNA sequences.** The target DNA sequence for the  
118 development of our TreSR protocol was a new scDBD containing a TR of two consecutive LacI DBDs  
119 (residues 1 through 89). The goal of the DNA sequence redesign procedure was to introduce silent  
120 mutations that would allow the duplicated DNA sequence to be constructed via site-selective  
121 oligonucleotide assembly by reducing the sequence similarity between the TR-encoding regions while  
122 preserving the amino acid identity of the construct. A summary of the TReSR workflow is shown in Figure  
123 1. Segment lengths between 5 and 7 amino acid residues were chosen to reduce the total combinatorial  
124 space of silent mutations to be evaluated (Fig 1A). Thermodynamic parameter evaluation was conducted  
125 using the DINAMelt two-state melting hybridization application made available through the UNAFold web  
126 server [24] to predict melting temperatures ( $T_m$ ) for homodimeric pairs of forward ( $T_{FF}$ ) and reverse  
127 complement ( $T_{RR}$ ) sequences, as well as heterodimerization between the forward and reverse complement  
128 ( $T_{FR}$ ) sequences (Fig 1B). Codon segment combinations were then filtered, rejecting segments that form  
129 undesired stable homodimers ( $T_{FF}$  and  $T_{RR}$ ) or which hybridize with the wild-type LacI sequence ( $T_{WT}$ ), while  
130 preferentially selecting for codon combinations that have strong heterodimerization ( $T_{FR}$ ) potentials using a  
131 percentile-based threshold calculated for each segment. Specifically, a more stringent 50<sup>th</sup> percentile was  
132 used to set parameter thresholds which minimized potential off-target segment assemblies ( $T_{FF}$ ,  $T_{RR}$ , and  
133  $T_{WT}$ ) while a less stringent 10<sup>th</sup> percentile was employed to establish parameter thresholds favouring  
134 hybridization with the target segment ( $T_{FR}$ ). The values for these percentile-based thermodynamic  
135 parameter thresholds are reported in Table S1. A comparison of similarity between codon combinations  
136 encoding the same protein segment was performed by computing pair-wise percent sequence identities  
137 (Fig 1C). Codon combinations were grouped according to whether they shared high sequence  
138 complementarity (percent sequence identity  $\geq 80.0\%$ ), and whether the codon pair shared similar profiles  
139 for percent sequence identity values with respect to the other codon combinations for the segment, as  
140 evaluated by a cosine similarity comparison ( $\cos \geq 0.9975$ ). Due to the large number of remaining codon

141 combinations, the proceeding steps in the TReSR protocol were limited to codon combinations from four  
142 randomly selected groups for each segment, excluding all other codon combinations from further  
143 consideration (Table S1). All combinations of adjacent pairs of codon combinations were joined, and  $T_{FF}$ ,  
144  $T_{RR}$ , and  $T_{FR}$  values evaluated (Fig 1D) and filtered (Table S2) to discard segment pairs predicted to have  
145 high  $T_{FF}$ ,  $T_{RR}$  and low  $T_{FR}$  values which would prove potentially problematic during aPCR. Again, a  
146 percentile-based threshold was employed to discard adjacent codon combination pairs with high  
147 homodimerization affinities (20<sup>th</sup> percentile) while a fixed value for heterodimerization ( $T_{FR} = 80.0$  °C) was  
148 employed to select for an appropriate set of adjacent codon combination pairs to carry forward in the  
149 protocol. The TReSR protocol was concluded using a depth-first search to design the single-chain construct  
150 template (Fig 1E), selecting 100 paths which visit distinct codon combinations from different groupings  
151 thereby ensuring that the duplicated DNA sequences would be dissimilar and thus amenable to aPCR  
152 synthesis. A single path of segments was selected to serve as the TR DNA sequence template reported in  
153 Table S3. This TR DNA sequence template was then partitioned into oligonucleotide primers for aPCR  
154 synthesis [25]. Refer to the TReSR Computer Code and Documentation section in the Supplementary  
155 Information for the Python3.8 computer code and documentation for the TReSR protocol program.

156

157 **Construction of the genetic circuit.** The pET-11a plasmid (Novagen) was used as the genetic vector to  
158 host all three components constituting our genetic circuit. These three components include Cloning Site I  
159 whose genetic insert is expressed by the pDBD promoter regulated by the LacI mutant W220F (LacI<sub>W220F</sub>),  
160 Cloning Site II serving as the reporter protein expression cassette under the control of the pGFP promoter,  
161 and Cloning Site III providing LacI<sub>W220F</sub> under the control of its native promoter pLacI. This plasmid was  
162 transformed and propagated in electrocompetent *Escherichia coli* DH10B [26] via the ColE1 origin with a  
163 copy number estimated at 25 to 30 plasmids per cell [27] and AmpR selection marker conferring ampicillin  
164 resistance with working concentration of 100  $\mu\text{g}\cdot\text{mL}^{-1}$  [28]. Combinations of the pLacI and pLacI<sup>Q</sup> promoters  
165 [29] were paired with the LacI repressor and its variant W220F [30], constructed by successive quick-  
166 change PCR reactions. Cloning Sites I and II were incorporated into the pET-11a vector via circular  
167 polymerase extension cloning (CPEC) [31] of linear insert cassettes synthesized by aPCR [16] of the pDBD  
168 and pGFP promoters and their fusion to the eGFP gene [32] by SOE PCR [18]. Unique restriction enzyme

169 sequences for BamHI and NdeI were introduced to the flanking regions of Cloning Site I, and XhoI and  
170 NheI flanking Cloning Site II to enable insertion of gene cassettes at these sites, and both Cloning Sites I  
171 and II are flanked by an identical T7 terminator sequence [33]. Insertion of gene cassettes into Cloning Site  
172 III were performed using the NdeI restriction sequence belonging to cloning Site I and an EcoRI site 42 BP  
173 downstream of the T7 terminator sequence of Cloning Site II.

174

175 **Construction of the eGFP and dGFP genes.** A copy of *Aequorea victoria* GFP<sub>S65T</sub> [34] was provided to  
176 us by the Chica laboratory, incorporated into the cloning site of the pET-11a. This gene was used as the  
177 template to produce eGFP by introducing F64L and H231L mutations by site-directed mutagenesis, yielding  
178 eGFP (avGFP<sub>F64L/S65T/H231L</sub>). Notably, our eGFP gene lacks the M1\_S2insV insertion mutation  
179 corresponding to the NcoI cloning scar found in the originally reported construct [32]. The decoy fluorescent  
180 protein (dGFP) used to mimic eGFP expression burden while masking fluorescence output was produced  
181 by introducing the R96A mutation [35] into eGFP by quick-change mutagenesis producing  
182 avGFP<sub>F64L/S65T/R96A/H231L</sub>.

183

184 **Molecular Biology Reagents and Sequencing Service.** All aPCR, SOE, CPEC, and quick change PCR  
185 reactions were performed using Vent DNA polymerase (purchased from New England Biolabs, NEB) and  
186 oligonucleotide primers purchased from Eurofins Genomics. Quick change PCR reactions were adapted  
187 by replacing the DpnI digestion step with a gel extraction protocol (QIAquick Gel Extraction Kit, Qiagen).  
188 Restriction digestion reactions for preparation of vector and insert DNA was processed using BamHI-HF,  
189 EcoRI-HF, NdeI, NheI-HF, and XhoI enzymes (NEB). Vector DNA was dephosphorylated using quick cow  
190 intestinal phosphatase (QCIP) and ligation reactions conducted using T7 DNA ligase (NEB). Purification of  
191 DNA products was done by PCR cleanup (E.Z.N.A Cycle Pure Kit, Omega Bio-Tek) or gel extraction  
192 (QIAquick Gel Extraction Kit, Qiagen). Assembled plasmids were transformed into *E. coli* DH10B by  
193 electroporation and harvested by miniprep (E.Z.N.A. Plasmid DNA Mini Kit II, Omega Bio-Tek). All culturing  
194 was performed in LB Lenox media (BioShop) spiked with 100 µg·mL<sup>-1</sup> of ampicillin (BioShop). Solid media  
195 support was produced by dissolving agar (at a concentration of 15 g·L<sup>-1</sup>, BioShop) in LB (Lenox) liquid  
196 media preparation. Induction of Cloning Site I was controlled through isopropyl-β-D-thiogalactopyranoside



197 (IPTG, BioShop) added to achieve a working concentration of 10 mM. Evaluation of *in vivo* reporter protein  
198 expression was performed using a SpectraMax M2 plate reader (Molecular Devices) to record absorbance  
199 ( $\lambda_{ab} = 600$  nm) and fluorescence ( $\lambda_{ex} = 485$  nm,  $\lambda_{em} = 510$  nm, fixed gain = medium, 30 flashes per read)  
200 from 100  $\mu$ L aliquots of cell culture in black-walled and clear-bottomed 96-well format microplates (Greiner).  
201 The ColE1 origin and all Cloning Site I, II and LacI genotypes were confirmed by Sanger Sequencing  
202 services contracted through Génome Québec (centre d'expertise et de services Génome Québec).

203  
204 **Construction of the single-chain tandem repeat DNA binding domain repressors.** The first single-  
205 chain tandem repeat DNA binding domain (scDBD) repressor architecture constructed involved the full-  
206 length duplication of the N-terminal LacI DBD sequence (residues 1 through 89), incorporating the triple-  
207 mutation DFT (Y17D/Q18F/R22T) producing the non-functional scDBD<sub>DFT/DFT</sub> construct [21]. This construct  
208 was produced in a three-step synthesis where two N-terminal (DBD.N) and two C-terminal (DBD.C)  
209 fragments (DBD: residues 1 through 29, and LNK: residues 60 through 89) were first produced by aPCR and  
210 gel purified (described in detail in Supplementary Information Section 2). The DBD.N and DBD.C fragment  
211 pairs were independently fused to an unchanged intermediate PCR fragment (residues 30 through 59) by  
212 SOE PCR and subjected to PCR cleanup, prior to a third SOE reaction producing the full-length construct.  
213 This construct was digested (BamHI and NdeI) and gel extracted for insertion into the genetic circuit  
214 (prepared by gel extraction of restriction digestion reaction with QCIP, BamHI, and NdeI). The plasmid was  
215 harvested by miniprep, followed by confirmation of scDBD<sub>DFT/DFT</sub> construct identity by sequencing. This  
216 template was then subjected to site-directed mutagenesis introducing the functional triple-mutation IAN  
217 (D17I/F18A/T22N) at N-terminal and C-terminal duplicated DBDs producing three additional constructs by  
218 SOE: scDBD<sub>IAN/DFT</sub>, scDBD<sub>DFT/IAN</sub>, and scDBD<sub>IAN/IAN</sub>. These constructs were similarly inserted into the  
219 genetic circuit by digestion, gel purification, and ligation, and harvested by miniprep prior to sequencing.  
220 Lastly, C-terminal truncations omitting the duplicated 60 through 89 residue segment of each of the four  
221 constructs were produced by PCR: scDBD<sub>DFT/DFT/ $\Delta$ CT</sub>, scDBD<sub>IAN/DFT/ $\Delta$ CT</sub>, scDBD<sub>DFT/IAN/ $\Delta$ CT</sub>, and  
222 scDBD<sub>IAN/IAN/ $\Delta$ CT</sub>. Likewise, these constructs were inserted into the genetic circuit, harvested by miniprep,  
223 and sequenced.

224



225 ***In vivo* evaluation of genetic circuit output.** The protocol employed to assay and evaluate genetic circuit  
226 outputs was adapted from a previous publication assessing the burden imposed upon endogenous  
227 expression factors by exogenous genetic circuits (36). 1 mL LB Lenox pre-cultures were seeded with  
228 transformants plated onto a solid LB agar medium, under ampicillin selection. These pre-cultures were  
229 grown to stationary phase (37 °C, 300 rpm, 16 hours) and their densities recorded and normalized to 2.6  
230 units ( $\lambda_{ab} = 600$  nm). Density-normalized pre-cultures were passaged into a 2× concentration of LB Lenox  
231 (2.6 mL volume) spiked with a 2× concentration of ampicillin (5.2  $\mu$ L volume). Passaged cultures were  
232 distributed in 0.3 mL aliquots into deep 96-well format culture plates across 8 wells (–IPTG: 0.3 mL H<sub>2</sub>O,  
233 +IPTG: 0.3 mL 20 mM IPTG). The resulting culture plate setup allows for twelve separate transformants to  
234 be grown in quadruplicate at a 0.6 mL culture volume in the presence and absence of 10 mM IPTG with a  
235 starting density of 0.005 absorbance units ( $\lambda_{ab} = 600$  nm). Cultures were grown with shaking (37 °C, 300  
236 rpm) and sampled in 100  $\mu$ L aliquots at the 6, 7, 8, and 9-hour time-points, recording their density and  
237 fluorescent output. Linear regression analysis of culture density (Y:  $\lambda_{ab} = 600$  nm) as a function of time (X:  
238 hours), fluorescence (Y:  $\lambda_{ex} = 485$  nm,  $\lambda_{em} = 510$  nm, gain = medium, 30 flashes per read) as a function of  
239 time (X: hours), and fluorescence (Y:  $\lambda_{ex} = 485$  nm,  $\lambda_{em} = 510$  nm, gain = medium, 30 flashes per read) as  
240 a function of absorbance (X:  $\lambda_{ab} = 600$  nm) demonstrate that all measurements, regardless of absence or  
241 presence of 10 mM IPTG, were linear and recorded at steady-state (Figures S13–S20). Genetic circuit  
242 expression output (F) is reported by taking the quotient of fluorescence (GFP) and density (ABS) from each  
243 culture measurement (Equation 1).

$$244 \quad F = \frac{\text{GFP}}{\text{ABS}} \quad \text{Eq. 1}$$

245 All plotted data are reported as the arithmetic average across four measurements, with error bars indicating  
246 the standard deviation of the sample. To determine whether changes to genetic circuit outputs are  
247 statistically significant, two-tailed homoscedastic t-tests were performed with p-values reported for  
248 populations exhibiting statistically significant difference (*i.e.*, p-value  $\leq$  0.001).

249

## 250 **RESULTS**

251 **Overview of DNA sequence redesign protocol.** To enable the synthesis of a construct containing TR  
252 elements we developed a DNA sequence design protocol called TReSR (for **T**andem **R**epeat **S**equences)

253 **Redesign**) which was implemented as a script run in Python3.8 (Supplementary Information). Using the  
254 strategy outlined in Figure 1, TReSR introduces silent mutations into TR sequences to reduce the potential  
255 for off-target primer hybridization in PCR reactions, such as those required in aPCR and site directed  
256 mutagenesis protocols. The design protocol is conducted in five steps, beginning with the dissection of TR-  
257 encoding gene cassette regions into contiguous segments encoding 5 to 7 amino acid residues each (Fig  
258 1A). In the *second* step (Fig 1B), all codon combinations of silent mutations are generated for each segment  
259 and melting temperatures ( $T_m$ ) calculated for the forward ( $T_{FF}$ ) and reverse complement ( $T_{RR}$ ) homodimers,  
260 along with that of the forward sequence with its reverse complement ( $T_{FR}$ ) and for the forward sequence  
261 with the reverse complement belonging to the wild-type gene ( $T_{WT}$ ). These  $T_m$  values are used to exclude  
262 sequences prone to homodimerization or hybridization with the wild-type sequence, and include sequences  
263 predicted to have strong self-hybridization values. Sequences that do not meet percentile-based thresholds  
264 for these thermodynamic parameters are then discarded before moving to the next step. In the third step  
265 (Fig 1C)  $T_m$  values are calculated for heterodimers formed between pairs of remaining segment sequences  
266 to build an interaction graph and identify a set of compatible sequences for each segment (i.e., segments  
267 with unique codon combinations having minimal heterodimerization  $T_m$ 's). In the fourth step (Fig 1D),  
268 unique sequences are paired with adjacent segment sequences and again filtered based on calculated  $T_m$   
269 values following the same protocols performed in the second step. The fifth and final step (Fig 1E) involves  
270 a depth-first search joining randomly selected paths from contiguous segment pairs. One assembled path  
271 is then chosen at random and primer hybridization parameters evaluated to ensure that the chosen  
272 sequence does not have significant off-target hybridization propensity that would complicate its construction  
273 by aPCR.

274  
275 To test the ability of TReSR to design an aPCR-compatible DNA sequence for an engineered TR-protein,  
276 we chose to construct a single-chain (sc) repressor containing two identical copies of the DBD of the lactose  
277 repressor (LacI), called scDBD. Native LacI interacts with DNA as a dimer, with each subunit donating an  
278 N-terminal DBD that binds one half of the nearly symmetrical *lacO* operator sequence, followed by a linker  
279 region and lactose-binding regulatory domain that inhibits DNA binding when bound to 1,6-allolactose or  
280 its analogue isopropyl  $\beta$ -D-1-thiogalactopyranoside (IPTG) [20]. Our experimental construct contains two

281 copies of LacI amino acid residues 1 – 89 organized as a bead-on-a-string tandem repeat. This region of  
282 LacI was selected because previously published studies have demonstrated that the duplication of helix-  
283 turn-helix domains was sufficient to confer DNA binding capabilities to single-chain repressors [37, 38].  
284 Thus, the scDBD repressor construct is designed to bind the operon constitutively to block transcription of  
285 the downstream gene. Given the well-characterized suite of DBD-operator sequence combinations that  
286 have been identified for this family, the designed scDBD repressor has the potential to expand the range  
287 of transcriptional regulators that can be used in synthetic biology applications.

288

289 **Implementation of the TReSR protocol.** To make the problem of DNA sequence redesign more tractable,  
290 it was necessary to first divide the targeted sequence into smaller segments encoding between 5 and 7  
291 amino acid residues. The choice of a maximum of 7 residues per segment reduced the combinatorial  
292 sequence space to a manageable size and also made evaluation of thermodynamic parameters more  
293 efficient. This choice of segment length was also convenient for design of a sequence that would be  
294 compatible with aPCR, since the DNA encoding these segments would be half the length of a typical  
295 oligonucleotide primer needed for this method.

296

297 For the redesign of the scDBD TR-encoding sequences, LacI DBD residues 1 through 29 was divided into  
298 5 contiguous segments (labeled A through E), and residues 60 through 89, divided into six contiguous  
299 segments (F through K). For each segment (Table S1), all possible codon combinations containing silent  
300 mutations were generated, yielding between 128 (segment B) and 3,072 (segment E) different DNA  
301 sequences per segment. The UNAFold web server was employed to calculate  $T_m$  hybridization values ( $T_{FF}$ ,  
302  $T_{RR}$ ,  $T_{FR}$ , and  $T_{WT}$ ) for all DNA segments, and the list of segments pruned using percentile-based thresholds  
303 ( $T_{FF} = 0.5$ ,  $T_{RR} = 0.5$ ,  $T_{FR} = 0.2$ , and  $T_{WT} = 0.5$ ). The values for these thresholds, tabulated in Table S1,  
304 pruned approximately 70 to 86% of the total DNA codon combinations belonging to each segment (Fig 1B).  
305 For each segment, pairwise percent sequence identity values were calculated for the filtered set of codon  
306 combinations. These values were used to construct an interaction graph with vertices, representing  
307 individual codon combinations, connected by edges, indicating the percent sequence identity between pairs  
308 of codon combinations belonging to the graph (schematically illustrated in Fig 1C). This graph was used to

309 group codon combinations based on their shared sequence identity. A pair of codon combinations were  
310 assigned the same group designation if they shared 80% sequence identity and if they had similar percent  
311 identity profiles with the remaining codon combinations in the graph, as determined by a cosine similarity  
312 comparison (threshold  $\geq 0.9975$ ). This grouping procedure produced between 6 (segment B) and 129  
313 (segment H) distinct groupings for the set of eleven protein segments (Table S1). To reduce the total  
314 number codon combinations carried forward for the remainder of the TReSR protocol, the space of codon  
315 combinations was constrained to those belonging to four randomly selected groups from each segment.

316  
317 To determine which codon combinations originating from adjacent protein segments were compatible for  
318 synthesis by PCR, the thermodynamic parameters ( $T_{FF}$ ,  $T_{RR}$ , and  $T_{FR}$ ) for DNA sequences constructed from  
319 pairs of adjacent codon combinations were compiled, specifically: codon combinations for segment A were  
320 paired with those for segment B (A+B), as well as B+C, C+D, D+E, F+G, G+H, H+I, I+J, J+K and K+A. This  
321 list of adjacent codon combinations was then filtered using the thresholds reported in Table S2 (20<sup>th</sup>  
322 percentile for  $T_{FF}$  and  $T_{RR}$  with a fixed value of 80 °C for  $T_{FR}$ ), reducing the number of paired DNA sequences  
323 by approximately 13 to 40%. A depth-first search was then performed to assemble scDBD DNA template  
324 sequences from the set of filtered adjacent segments using contiguous segments belonging to distinct  
325 groupings. The resulting template was designed to encode LacI residues 1 through 29 (segments A to E)  
326 joined with LacI residues 60 through 89 (segments F to K) to make the N-terminal DBD (DBD.N) joined to  
327 a template encoding the same DBD sequence at the C-terminus (DBD.C).

328  
329 We analyzed the first DNA template produced by TReSR (out of 100 templates generated) and found that  
330 42 and 46 unique silent mutations were introduced into the DBD.N and DBD.C templates across a design  
331 space of 59 total codons (Fig 2). The resulting DBD.N and DBD.C templates have reduced sequence  
332 identity with each another, measured at 65% between the pair, and the wild-type LacI sequence, recorded  
333 at 66% and 63%, respectively. Thermodynamic parameters calculated for segment sequences (Table S3)  
334 showed hybridization values that are compatible with aPCR synthesis, with reduced homodimerization  $T_m$   
335 (°C) across all segments ( $-58.9 \leq T_{FF} \leq 18.7$  and  $-43.7 \leq T_{RR} \leq 19.6$  °C). All segment hybridization affinities  
336 ( $62.5 \leq T_{FR} \leq 74.4$  °C) were within the range typically required for annealing and extension steps employed

337 during PCR. An additional advantage of the TReSR-generated sequences are the low hybridization  $T_m$   
338 values with the wild-type *Lacl* sequence ( $-15.4 \leq T_{WT} \leq 43.7$  °C) suggesting that downstream PCR  
339 manipulation of the scDBD sequence should be possible even with the presence of the *Lacl* gene on the  
340 same plasmid.

341  
342 **Synthesis of the Tandem Repeat Repressor.** The template sequence shown in Figure 2 was partitioned  
343 into twelve primers for each domain (N.1 – N.12 and C.1 – C.12 for DBD.N and DBD.C, respectively) such  
344 that the 3'-termini of all primers were comprised of at least one G/C base-pair and sequence overlap with  
345 adjacent primers was designed to ensure efficient assembly of primers ( $T_m > 64$  °C) while limiting length  
346 to no more than 44 bases (Table 1). Residues 17, 18, and 22 directing the operator specificity for each  
347 DBD are delivered on primers 4 and 5, named according to their triple-mutation identity (DFT: **D17/F18/T22**  
348 and IAN: **I17/A18/N22**). According to predictions of thermodynamic parameters shown in Table 1, all  
349 primers are expected to adopt linear secondary structures in solution ( $\Delta G_F^{72^\circ\text{C}}$  and  $\Delta G_R^{72^\circ\text{C}} > 0.0$  kcal·mol<sup>-1</sup>)  
350 preferentially favouring hybridization with their reverse complement sequences ( $T_{FR} \geq 75.2$  °C) over  
351 formation of undesired homodimers ( $T_{FF} \leq 40.7$  °C and  $T_{RR} \leq 46.3$  °C). Lastly, a comparison of predicted  
352 hybridization affinities between pairs of primers was conducted to ensure successful assembly of the target  
353 template DNA sequences for scDBD<sub>DFT/DFT</sub> and scDBD<sub>IAN/IAN</sub> (Fig S1). Analysis of predicted hybridization  
354  $T_m$  values suggests that all primers will hybridize with sufficient affinity to their adjacent counterparts under  
355 reaction conditions employed during PCR ( $T_{HYB} \geq 70$  °C) without forming side-products that result from  
356 hybridization between pairs of non-adjacent primers.

357 **Table 1.** Assembly PCR oligonucleotide primers for the TReSR designed tandem repeat repressor

| Primer Name | Sequence (5' → 3')                           | Hybridization (°C) |                 |                 | Folding (kcal·mol <sup>-1</sup> ) |                                 |
|-------------|----------------------------------------------|--------------------|-----------------|-----------------|-----------------------------------|---------------------------------|
|             |                                              | T <sub>FF</sub>    | T <sub>RR</sub> | T <sub>FR</sub> | ΔG <sub>F</sub> <sup>345K</sup>   | ΔG <sub>R</sub> <sup>345K</sup> |
| pDBD.F      | CCAGTAGTAGGTTGAGGC                           | -29.0              | -20.9           | 71.2            | 2.62                              | 2.89                            |
| pDBD.R      | CAGGCTTCATTTTTTCTCCTTCTAGTTAAACAAAATTATTTG   | 40.3               | 38.0            | 79.1            | 1.48                              | 1.63                            |
| N.1         | CTAGAAGGAGGAAAAAATGAAGCCTGTTACCCTG           | -5.0               | -15.2           | 81.2            | 1.68                              | 1.48                            |
| N.2         | CTCTGCCACGTCATACAGGGTAACAGGCTTCATTTTTTTC     | 26.7               | 30.1            | 84.7            | 2.03                              | 1.93                            |
| N.3         | CCTGTATGACGTGGCAGAGTATGCAGGAGTGAGC           | 40.7               | 11.2            | 86.5            | 0.84                              | 1.43                            |
| DFT.N.4     | CTACCGTGCTAACCGTAAAATCGCTCACTCCTGCATACTCTG   | -1.2               | -0.1            | 86.7            | 2.54                              | 1.02                            |
| IAN.N.4     | CTACATTAGAGACCGTGGAATGCTCACTCCTGCATACTCTG    | 36.6               | 37.3            | 86.7            | 0.94                              | 0.93                            |
| DFT.N.5     | GATTTTACGGTTAGCACGGTAGTAAACCAAGCCTCCCATG     | 28.6               | 36.6            | 85.5            | 1.27                              | 1.26                            |
| IAN.N.5     | CATTGCCACGGTCTCTAATGTAGTAAACCAAGCCTCCCATG    | -20.5              | -3.1            | 86.5            | 1.97                              | 1.24                            |
| N.6         | CATGGGAGGCTTGGTTTACTAC                       | -3.1               | -1.6            | 75.2            | 2.29                              | 2.61                            |
| Lacl.N.F    | GTAGTAAACCAAGCCTCCCATGTTTCTGCGAAAACGC        | 26.2               | 27.6            | 85.7            | 1.82                              | 0.22                            |
| Lacl.N.R    | GACTCCAATGAGCAGGGATTGTTTGCCCGCCAGTTG         | 25.4               | 29.5            | 88.8            | 1.64                              | 1.24                            |
| N.7         | CAATCCCTGCTCATTGGAGTCGCTACATCGTC             | 10.6               | 14.0            | 84.4            | 1.52                              | 1.57                            |
| N.8         | GCGTGTAAGGCAAGGGACGATGTAGCGACTCCAATG         | 26.3               | 10.6            | 87.8            | 1.57                              | 1.72                            |
| N.9         | GTCCCTTGCCTTACACGCCCTCTCAAATC                | -17.0              | -4.3            | 86.7            | 1.72                              | 2.26                            |
| N.10        | CCTTGACTTTATGGCAGCTACGATTTGAGAGGGGGCGTG      | -1.6               | 18.8            | 88.3            | 1.24                              | 1.65                            |
| N.11        | CGTAGCTGCCATAAAGTCAAGGGCTGACCAAATG           | 18.8               | 23.4            | 84.8            | 1.34                              | 1.09                            |
| N.12        | CATACAAAGTGACGGTTTTTCATTTGGTCAAGCCCTTGAC     | 5.7                | -0.6            | 85.3            | 1.44                              | 1.39                            |
| C.1         | CAAATGAAACCCGCTCACTTTGTATGATGTAG             | -4.3               | -2.6            | 77.6            | 2.04                              | 1.66                            |
| C.2         | GCATATTCGGCTACATCATAAAAGTGACGGGTTTC          | -2.6               | -12.4           | 82.7            | 1.66                              | 2.04                            |
| C.3         | CTTTGTATGATGTAGCCGAATATGCAGGCGTAAG           | 29.8               | 32.3            | 81.5            | 1.49                              | 1.94                            |
| DFT.C.4     | CTACAGTAGAGACGGTGAAGTCACTTACGCCTGCATATTCGG   | 33.4               | 35.1            | 86.3            | 1.62                              | 0.72                            |
| IAN.C.4     | CTACATTGCTCACTGTAGCGATACTTACGCCTGCATATTCGG   | 34.4               | 46.3            | 85.7            | 1.38                              | 1.10                            |
| DFT.C.5     | CTTACCGTCTCTACTGTAGTCAATCAGGCGAGTCATG        | 40.2               | 37.1            | 84.8            | 1.89                              | 1.58                            |
| IAN.C.5     | CGCTACAGTGAGCAATGTAGTCAATCAGGCGAGTCATG       | 47.6               | 39.6            | 85.7            | 1.98                              | 1.84                            |
| C.6         | CATGACTCGCCTGATTGACTAC                       | -0.4               | -6.4            | 74.9            | 2.12                              | 2.10                            |
| Lacl.C.F    | GTAGTCAATCAGGCGAGTCATGTTTCTGCGAAAACGCG       | 30.1               | 31.4            | 86.4            | 1.60                              | 0.22                            |
| Lacl.C.R    | GCTCTGTTTGCCCGCCAGTTG                        | -3.2               | 19.0            | 81.5            | 2.35                              | 1.79                            |
| C.7         | CTGGCGGGCAAACAGAGCCTTTTGATAGGGGTAGCAACG      | 25.1               | 26.8            | 90.0            | 0.93                              | 1.57                            |
| C.8         | GAATCGTTGCTACCCCTATCAAAGG                    | 8.7                | 1.2             | 78.9            | 1.96                              | 1.79                            |
| C.9         | GATAGGGGTAGCAACGAGTTCATTGGCACTC              | 1.2                | 29.8            | 83.2            | 1.79                              | 1.68                            |
| C.10        | CTATCTGGGAAGGTGCATGGAGTGCCAATGAACTCGTTG      | 30.1               | 22.1            | 87.1            | 1.03                              | 0.78                            |
| C.11        | CCATGCACCTTCCCAGATAGTGGCAGCAATCAAATCGAG      | 15.0               | 17.8            | 87.4            | 1.27                              | 1.03                            |
| C.12        | CCTATCATTACTGGTCCGCTCTCGATTTGATTGCTGCCAC     | 17.8               | 15.0            | 86.7            | 1.39                              | 0.41                            |
| T7T.F       | GAGCGACCAGTAATGATAGGGATCC                    | 29.3               | 25.6            | 80.0            | 0.41                              | 2.00                            |
| T7T.R       | GCAGCCGATCCCTATCATTACTGGTCCG                 | 34.3               | 30.3            | 85.1            | 1.62                              | 0.41                            |
| ΔCT.R       | GCAGCCGATCCCTATCATTAACTCGTTGCTACCCCTATCAAAGG | 34.3               | 30.3            | 88.3            | 2.00                              | 1.96                            |

359 To create the DNA cassettes encoding scDBD tandem repeat repressor containing either the DFT or IAN  
360 set of mutations, PCR reactions were performed to synthesize 4 fragments for each domain, with DBD.N  
361 produced by SOE of fragments 1 through 4 and DBD.C produced by SOE of fragments 4 through 7, using  
362 the reaction schematic illustrated in Figure S2. Specifically, aPCR was conducted using primers: N.1  
363 through N.6 to produce fragment 2 (encoding Lacl residues 1 to 29 for DBD.N), N.7 through N.12 to  
364 produce fragment 4 (encoding Lacl residues 60 to 89 for DBD.N), C.1 through C.6 to produce fragment 5  
365 (encoding Lacl residues 1 to 29 for DBD.C), and DBD.C.7 through DBD.C.12 with T7T.F and T7T.R to  
366 produce fragment 7 (encoding Lacl residues 60 to 89 for DBD.C). Regions of the scDBD-encoding  
367 sequence that were not part of the TR targeted by TReSR were amplified using conventional PCR to make  
368 fragments 1, 3 and 6. Successful production of all fragments was supported by agarose gel analysis which  
369 all showed a single band at the expected molecular length (Fig S3). SOE was then used to construct the  
370 larger fragments encoding the DBD.N domain (composed of fragments 1 to 4) and DBD.C domain  
371 (composed of fragments 4 to 7). To construct the full-length tandem repeat constructs scDBD<sub>DFT/DFT</sub> and  
372 scDBD<sub>IAN/IAN</sub> (sequences provided in Fig S4A, B), fragments encoding DBD.N and DBD.C containing the  
373 appropriate triple mutant were joined using a final SOE reaction. Agarose gel electrophoresis demonstrated  
374 that all SOE reactions were successful in producing the target fragments (Fig S3).

375  
376 As intended by the TReSR design protocol, the full-length template containing this TR-encoding sequence  
377 could also be used to site-selectively mutate a single DBD without interference from the other DBD in the  
378 TR. Moreover, those PCR mutagenesis reactions were performed using DNA templates in a plasmid also  
379 carrying the gene for the native Lacl repressor. No cross-reactivity with the primers targeting one the TR  
380 domains was detected, with only the targeted PCR product being observed by agarose gel electrophoresis  
381 (Figure S3) and confirmed by DNA sequencing (Fig S4). This was expected since the TReSR algorithm  
382 was designed to exclude sequences that might hybridize with the WT gene (*i.e.*,  $T_{WT} \leq 43.7$  °C for all  
383 segment sequences in Table S3). Together, these results demonstrate that application of the TReSR  
384 protocol enabled the design of TR DNA sequence templates suitable for assembly and manipulation by  
385 PCR.

386



387 **Design of a three-component genetic circuit to evaluate function of scDBD constructs *in vivo*.** To  
388 evaluate the function of our scDBD constructs, a three-component genetic circuit was designed (Fig 3A)  
389 placing expression of the experimental scDBD repressor under inducible control to evaluate its function  
390 reported by a cell-based fluorescence assay. We chose to construct our genetic circuit on a single plasmid  
391 (sequence provided in Fig S5) since this was expected to reduce its burden on the fitness of its biological  
392 hosts by reducing the number of replication origins and selection markers required to propagate and select  
393 for the genetic circuit [36]. The genetic circuit contains three components, identified as Cloning Sites I, II,  
394 and III, each responsible for delivery of the experimental scDBD repressor, eGFP reporting protein, and  
395 LacI repressor protein responsible for regulation of scDBD expression, respectively. Cloning Site III  
396 incorporates the gene encoding the W220F variant of the lac repressor (LacI<sub>W220F</sub>) under the control of the  
397 constitutive pLacI promoter (pLacI), labelled pLacI(LacI<sub>W220F</sub>). This variant of the LacI repressor was  
398 selected after testing a set of plasmids with combinations of repressors (LacI or LacI<sub>W220F</sub>) paired with  
399 promoters (pLacI or pLacI<sup>Q</sup>), confirming the superior ability of pLacI(LacI<sub>W220F</sub>) to repress transcription from  
400 the pDBD promoter bearing lacO<sup>sym</sup> operator sequences in the absence of inducer while simultaneously  
401 maximizing output expression upon induction (Fig S6–S9 and Table S4–S8) [30]. The ability of the  
402 pLacI(LacI<sub>W220F</sub>) regulatory component to minimize the occurrence of inducer-free (*i.e.*, 'leaky') expression  
403 events was required to evaluate scDBD function since the output of the genetic circuit must be reported in  
404 the absence and presence of scDBD expression. Details concerning this engineering effort are included in  
405 the Supplementary Information section: Engineering and Optimization of the three-Component Genetic  
406 Circuit.

407  
408 Cloning Site I delivers the experimental scDBD repressor constructs that were synthesized by aPCR and  
409 SOE (Fig S3) using primers designed by TReSR (Table 1). The scDBD constructs were inserted into  
410 Cloning Site I under the control of the promoter pDBD (Fig 3B), outfitted with a pair of lacO<sup>sym</sup> operator  
411 sequences (lacO<sup>sym</sup>: 5'–AATT**GTGAGCGCTCAC**AATT–3'), placed at core [36] and proximal [39] positions  
412 relative to the RNA polymerase recruitment sequence [40]. Repression of pDBD by LacI<sub>W220F</sub> is mediated  
413 by a specific DBD-operator interacting pair (*i.e.*, the LacI DBD containing the wild-type triple-residue  
414 sequence **Y17/Q18/R22** is selectively recruited to the lacO<sup>sym</sup> operator sequence) [21]. This promoter

415 architecture ensures that scDBD expression can be selectively controlled by the addition of IPTG in a dose-  
416 dependent manner, minimizing the basal level of expression in the absence of the inducer (Fig S14).

417

418 The activity of the genetic circuit is reported using a third component, which delivers the genetically encoded  
419 reporter, enhanced green fluorescent protein (eGFP) [32], to Cloning Site II whose promoter, pGFP (Fig  
420 3B), is regulated by the expression of functional scDBD repressor constructs. Specific recruitment of  
421 functional scDBD constructs to pGFP is accomplished by employing the DBD triple-mutation  
422 Y17I/Q18A/R22N which selectively binds a variant of the symmetric lac-type operator called lacO<sup>TTA</sup>  
423 (sequence 5'-AATTTTAAGCGCTTAAATT-3', with bolded residues indicating site of mutations) [21]. This  
424 three-component genetic circuit architecture ensures that repression of pGFP is specifically mediated by  
425 functional scDBD repressor without interference from LacI<sub>W220F</sub> which is incorporated to regulate expression  
426 of scDBD constructs. This genetic circuit setup is therefore designed to allow expression of eGFP in the  
427 absence of IPTG since expression of scDBD by its promoter (pDBD) is inhibited by LacI<sub>W220F</sub>. Conversely,  
428 in the presence of IPTG, LacI<sub>W220F</sub> dissociates from pDBD, enabling expression of the scDBD repressor  
429 candidate which, if functional, would bind to pGFP to repress expression of the reporter protein. Thus, the  
430 genetic circuit functions to report on scDBD repressor activity by inverting input induction and output  
431 fluorescent signal. To reduce the potential influence of junction interference on expression levels of eGFP,  
432 identical T7 terminator sequences [33] were introduced at the 3'-termini of both Cloning Site I and II coding  
433 regions, while upstream promoter elements were outfitted with identical riboJ genetic insulator, hairpin, and  
434 ribosome binding site sequences [41, 42]. Relative expression levels were measured for pDBD and pGFP  
435 promoters in a series of experiments to demarcate the minimum and maximum signal output that can be  
436 produced by the genetic circuit in our chosen host expression system, with results described in detail in  
437 Supplementary Information section: Expression Controls for the three-Component Genetic Circuit (Fig  
438 S10–S13 and Table S9). With this data it was possible to use this single-plasmid genetic circuit to evaluate  
439 the function of our designed scDBD repressors in a quantitative manner (Fig S14B).

440

441 **Evaluation of scDBD repressor function.** To evaluate the function of our scDBD repressor, four variants  
442 of the genetic circuit were made from a combination of DBDs with the functional IAN (Y17I/Q18A/R22N)

443 and non-functional DFT (Y17D/Q18F/R22T) triple-mutations, incorporated into DBD.N and/or DBD.C  
444 domains of our scDBD repressor construct (Fig S15-S22 and Table S10). As native lac repressor binds  
445 DNA in a dimeric state, we anticipated that only scDBD repressor constructs incorporating the functional  
446 IAN mutation in both DBDs would be able to bind pGFP to repress transcription of the eGFP gene. As  
447 shown in Figure 4, a representative sample of the density-normalized fluorescence taken at the 8-hour time  
448 point in the presence of 10 mM IPTG resulted in a 5-fold reduction in genetic circuit output signal relative  
449 to that obtained for the circuit grown in the absence of IPTG. This repression of eGFP expression by the  
450 scDBD repressor was only obtained when both N- and C-terminal DBDs contained the IAN mutation  
451 required for recognition of the lacO<sup>sym</sup> variant operator (lacO<sup>TTA</sup>: G6T/T5/G4A) incorporated in the pGFP  
452 promoter. Moreover, the same result was obtained when this combination of scDBDs was truncated  
453 (scDBD<sub>IAN/IAN/ΔCT</sub>) to eliminate the C-terminal copy of the DBD linker region (residues 61 to 89), as only the  
454 variant that contained the IAN mutation in both DBDs showed a reduction in fluorescence upon addition of  
455 IPTG (3.8 ± 0.2-fold decrease in density normalized fluorescence in the presence of 10 mM IPTG at the 8-  
456 hour time point). These results suggest that both scDBD<sub>IAN/IAN</sub> and its truncated counterpart,  
457 scDBD<sub>IAN/IAN/ΔCT</sub>, act to selectively repress expression from the pGFP promoter without the need for  
458 dimerization that is characteristic of the native lac repressor. This demonstration of scDBD repressor  
459 function illustrates the ability of TReSR to create new functional proteins containing TR motifs without the  
460 need to resort to total gene synthesis.

461

## 462 **DISCUSSION**

463 We chose to demonstrate the utility of TReSR by duplicating a domain-length sequence, in this case the  
464 LacI DBD, since this type of TR construct tends to be one of the most difficult to construct by aPCR methods.  
465 The repression of eGFP expression via the action of the scDBD<sub>IAN/IAN</sub> and scDBD<sub>IAN/IAN-LNK</sub> repressors  
466 reported by our genetic circuit demonstrates that even for this challenging system, TReSR was able to  
467 create a DNA sequence encoding the TR that allowed its cost-effective assembly by aPCR and SOE.  
468 Moreover, the DNA sequence produced by TReSR was also compatible with downstream introduction of  
469 mutations by PCR-based site-directed mutagenesis. TReSR design of DNA sequences therefore makes it  
470 possible to avoid the well-documented difficulties that are normally associated with manipulating repeating

471 DNA sequences [15]. This presents a significant advantage over other approaches that first independently  
472 engineer the function of modular domains and then assemble a final TR construct by gene synthesis or  
473 DNA ligation. For example, a phage display approach has been employed to identify pairs of zinc finger  
474 motifs that could be expressed together as a bead-on-a-string TR-containing protein capable of recognizing  
475 DNA sequences in the HIV-1 promoter [43, 44]. However, this method cannot be readily applied to TR  
476 constructs comprised of modules that do not have function when expressed as individual domains, like the  
477 DBDs that were used to engineer the scDBD in this study. As demonstrated using the scDBD triple-mutant  
478 variants containing a single functional DBD (*i.e.*, inactivating DFT triple mutations introduced to one of the  
479 DBDs), scDBD repressors required two functional DBDs to achieve repression. The use of TReSR to create  
480 TR-containing proteins with DNA sequences that allow aPCR assembly and PCR-based manipulation  
481 opens the door to simultaneous screening of more than one module and increases the range of TR-  
482 containing proteins that can be designed.

483

484 It is expected that our DNA sequence redesign strategy will be able to successfully accommodate the  
485 duplication of at least three domain-length sequences into a single construct, since it was possible to  
486 perform site-selective PCR-based manipulation of a single DBD in a plasmid that contained DBD  
487 sequences from both native LacI and the scDBD construct. Moreover, TReSR brought the sequence  
488 identity between segments encoding each DBD down to 66%, which can be considered a benchmark for  
489 predicting the success of future sequence redesign projects (*i.e.* aPCR and mutagenesis should be possible  
490 if a similar level of sequence identity is obtained from TReSR-designed sequences for other engineered TR  
491 proteins). Using this benchmark as a guideline, we anticipate that this will likely be possible for the design  
492 of a protein containing four TR domains, since most amino acids are encoded by four degenerate codons.  
493 Moreover, for TRs where the repeated sequence is shorter than the domain-length sequences targeted  
494 here (*e.g.* heptad repeat of a leucine zipper), it should be possible to use TReSR to create proteins  
495 containing a larger number of TRs.

496

497 While the task of computational redesign of DNA sequences to allow PCR-based mutagenesis and  
498 manipulation is not unique to this study, this is the first to identify dissimilar DNA sequence fragments prior

499 to assembly of the full-length construct. Previous strategies have been proposed where the targeted  
500 sequence is fragmented into oligonucleotides without introducing codon substitutions [25], or where  
501 sequence selection is rooted in thermodynamic prediction of oligonucleotide hybridization behaviours [24].  
502 Similar to our strategy, both DNAWorks [45] and Gene2Oligo [46] redesign DNA sequences by  
503 computationally evaluating codon substitutions conferring silent mutations which improve the  
504 thermodynamic parameters of select oligonucleotides for PCR synthesis. However, neither of these  
505 protocols compare DNA sequences of the fragments to reduce the similarity between them, which is critical  
506 for the generation of sequences encoding protein TRs. Although our strategy does not include codon usage  
507 frequency data when redesigning DNA sequences [47], this parameter could be included in the criteria used  
508 to prune codon combination lists (Fig 1B). Alternatively, low frequency codons could be removed from the  
509 codon table used in the TReSR calculations, or the effect of low-frequency codons could be mitigated by  
510 employing a tRNA-overexpression strategy with cell strains developed for this purpose [48]. This was not  
511 required for the scDBDs designed in this study, however, since expression levels of the repressor were  
512 sufficient for functional repression.

513  
514 One of the results arising from our demonstration of TReSR utility is the creation of a new scDBD from the  
515 DBD of the lac repressor which was capable of repressing expression from a modified *lacO* promoter. This  
516 repressor design is similar to a previously engineered scDBD repressor constructed by duplicating the N-  
517 terminal DBD from the bacteriophage 434 cl repressor which recognizes the symmetric 434 operator  
518 sequence [37]. DNA sequence recognition of this construct could be predictably altered to produce scDBDs  
519 that recognize asymmetric operators to investigate the influence of direct and indirect protein-DNA contacts  
520 on repressor-operator binding [49] or to identify cognate and specific protein-DNA interacting pairs [50].  
521 This same strategy for constructing scDBD repressors has also been employed with the lambda Cro  
522 repressor sequence [38]. Our results with the DBD of the lac repressor show that the same strategy can be  
523 extended to another well-characterized family of repressors. While the LacI DBD shares a similar helix-  
524 turn-helix motif to these bacteriophage repressors, the DNA recognition helix making direct contacts with  
525 the operator sequence is oriented in the opposite direction with respect to those bacteriophage repressors  
526 [51]. Despite this distinction, our results demonstrate that the same strategy for constructing scDBD

527 architectures from bacteriophage repressors is readily applicable to the LacI DBD and should follow the  
528 functional rules defining DBD recognition of operator DNA that had been defined with full-length LacI [21].  
529 In addition, this approach has the potential to be extended to include DBDs belonging to other members of  
530 the lac repressor superfamily [19], further increasing the range of promoter sequences that could be  
531 recognized.

532

533 While TReSR was created for the purpose of redesigning the DNA sequence of a novel TR protein (*i.e.*,  
534 the scDBD repressor constructs), this computational strategy also has the potential to be adapted to  
535 applications that do not involve TRs. This would involve modification of the TReSR methodology to compare  
536 non-identical protein segments, a task that could be facilitated by replacing the percent sequence identity  
537 metric (employed in the *third* step of the TReSR protocol, Fig 1C) with calculation of the  $T_m$  for hybridization  
538 between pairs of DNA sequences. This strategy has the potential to allow the redesign of DNA templates  
539 containing problematic regions to make them amenable to PCR-based manipulations by breaking the  
540 sequence down into fragments and generating codon combinations with more favorable hybridization  
541 parameters. This type of sequence redesign protocol would be particularly useful for mutagenesis of DNA  
542 templates in high-throughput procedures (*e.g.*, deep sequencing mutagenesis). The TReSR computational  
543 strategy could also be applied to the design and selection of reliable primers for assembly of DNA barcodes  
544 used in genotyping large populations of genetic samples. For this application, TReSR could be adapted to  
545 compare and select primer combinations that assemble in a defined order to generate unique DNA  
546 sequences (*i.e.*, barcodes) appended to amplicons in a single PCR reaction from isolated samples. These  
547 samples can then be pooled for next-generation sequencing thus enabling simultaneous sample  
548 identification and genotyping, provided that the amplicon length is amenable to the sequencing  
549 methodology employed. Similarly, the TReSR protocol could be applied to ribozyme design strategies to  
550 design interacting and non-interacting RNA sequences, which would open the door to the engineering of  
551 increasingly complex genetic programs and circuitry directing control over gene expression. Overall, the  
552 ability to redesign sequences using smaller segments with defined hybridization parameters lies at the core  
553 of the TReSR protocol, and offers opportunities for a wide range of potential applications.

554

555 **CONCLUSION.** The PCR synthesis and manipulation of TR DNA sequences presents a prohibitive  
556 challenge interfering with the routine incorporation of TR sequences in engineered proteins. To overcome  
557 this barrier, we devised and implemented a DNA sequence redesign protocol (TReSR) to construct TR  
558 DNA templates that are amenable to assembly and mutagenesis by PCR. TReSR predictions were  
559 validated by the construction of a single-chain tandem repeat repressor, created by duplicating the DNA  
560 binding domain of LacI. Experimental characterization of repressor construct function using a three-  
561 component genetic circuit confirms that this new repressor is functional. The use of TReSR to create TR-  
562 containing proteins with DNA sequences that allow aPCR and PCR-based manipulation opens the door to  
563 simultaneous screening of both modules and increases the range of TR-containing proteins that can be  
564 designed.

565

#### 566 **FUNDING**

567 This work was supported by a Natural Sciences and Engineering Research Council (NSERC) Discovery  
568 Grant (grant number RGPIN-2019-05730) and Discovery Accelerator Supplement (RGPAS-2019-00011)  
569 to NKG and an NSERC Postdoctoral Fellowship Award to JAD (funding reference number PDF516965).

570

#### 571 **REFERENCES**

- 572 1. Sinha R, Shukla P. Current trends in protein engineering: updates and progress. *Curr Protein Pept Sci.*  
573 2019;20: 398–407.
- 574 2. Nandagopal N, Elowitz MB Synthetic biology: integrated gene circuits. *Science.* 2011;333: 1244–1248.
- 575 3. Pellegrini M, Marcotte EM, Yeates TO. A fast algorithm for genome-wide analysis of proteins with repeated  
576 sequences. *Proteins.* 1999;35: 440–446.
- 577 4. Kajava AV. Tandem repeats in proteins: from sequence to structure. *J Struct Biol.* 2011;197: 279–288.
- 578 5. Delucchi M, Schaper E, Sachenkova O, Elofsson A, Anisimova M. A new consensus of protein tandem  
579 repeats and their relationship with intrinsic disorder. *Genes.* 2020;11: 407–425.
- 580 6. Berisio R, Vitagliano L, Mazzarella L, Zagari A. Crystal structure of the collagen triple helix model [(Pro-  
581 Pro-Gly)(10)](3). *Protein Sci.* 2002;11: 262–270.



5827. Liu J, Zheng Q, Deng Y, Cheng C-S, Kallenbach NR, Lu M. A seven-helix coiled coil. *Proc Natl Acad Sci USA*. 2006;103: 15457–15462.
5848. Neer EJ, Schmidt CJ, Nambudripad R, Smith TF. The ancient regulatory-protein family of WD-repeat proteins. *Nature*. 1994;371: 297–300.
5869. Kobe B, Deisenhofer J. The leucine-rich repeat: a versatile binding motif. *Trends Biochem Sci*. 1994;19: 415–421.
58810. Hatzfeld M. The armadillo family of structural proteins. *Int Rev Cytol*. 1999;186: 179–224.
58911. Mosavi LK., Cammett TJ, Desrosiers DC, Peng Z-Y. The ankyrin repeat as molecular architecture for protein recognition. *Protein Sci*. 2004;13: 1435-1448.
59112. Adams J, Kelso R, Cooley L. The kelch repeat superfamily of proteins: propellers of cell function. *Trends Cell Biol*. 2000;10: 17-24.
59313. Yoshimura SH, Hirano T. HEAT repeats - versatile arrays of amphiphilic helices working in crowded environments? *J Cell Sci*. 2016;129: 3963–3970.
59514. Paladin L, Hirsh L, Piovesan D, Andrade-Navarro MA, Kajava AV, Tosatto SCE. RepeatsDB 2.0: improved annotation, classification, search and visualization of repeat protein structures. *Nucleic Acids Res*. 2017;45: D308–D312.
59815. Hommelsheim CM, Frantzeskakis L, Huang M, Ülker B. PCR amplification of repetitive DNA: a limitation to genome editing technologies and many other applications. *Sci Rep*. 2014;23: 5052–5064.
60016. Stemmer WP, Cramer A, Ha KD, Brennan TM, Heyneker HL. Single-step assembly of a gene and entire plasmid from large numbers of oligodeoxyribonucleotides. *Gene*. 1995;164: 49–53.
60217. Bryksin AV, Matsumura I. Overlap extension PCR cloning: a simple and reliable way to create recombinant plasmids. *Biotechniques*. 2010;48: 463–465.
60418. Ho SN, Hunt HD, Horton RM, Pullen JK, Pease LR. Site-directed mutagenesis by overlap extension using the polymerase chain reaction. *Gene*. 1989;77: 51–59.
60619. Swint-Kruse L, Matthews KS. Allostery in the LacI/GalR family: variations on a theme. *Curr Opin Microbiol*. 2009;12: 129–137.
60820. Lewis M. The lac repressor. *C R Biol*. 2005;328: 521–548.

60921. Milk L, Daber R, Lewis M. Functional rules for lac repressor-operator associations and implications for  
610 protein-DNA interactions. *Protein Sci.* 2010;19: 1162–1172.
61122. Swint-Kruse L, Larson C, Pettitt BM, Matthews KS. Fine-tuning function: correlation of hinge domain  
612 interactions with function distinctions between LacI and PurR. *Protein Sci.* 2002;11: 778–794.
61323. Tungtur S, Egan SM., Swint-Kruse L. Functional consequences of exchanging domains between LacI and  
614 PurR are mediated by the intervening linker sequence. *Proteins.* 2007;68: 375–388.
61524. Markham NR, Zuker M. UNAFold: software for nucleic acid folding and hybridization. *Methods Mol Biol.*  
616 2008;453: 3–31.
61725. Tian S, Yesselman JD, Cordero P, Das R. Primerize: automated primer assembly for transcribing non-  
618 coding RNA domains. *Nucleic Acids Res.* 2015;43: W522–W526.
61926. Durfee T, Nelson R, Baldwin S, Plunkette G III, Burland V, Mau B, et al. The complete genome sequence  
620 of *Escherichia coli* DH10B: insights into the biology of a laboratory workhorse. *J. Bacteriol.* 2008;190:  
621 2597–2606.
62227. Hershfield V, Boyer HW, Yanofsky C, Lovett MA, Helinski DR. Plasmid ColE1 as a molecular vehicle for  
623 cloning and amplification of DNA. *Proc Natl Acad Sci USA.* 1974;71: 3455–3459.
62428. Steele C, Zhang S, Shillitoe EJ. Effect of different antibiotics on efficiency of transformation of bacteria by  
625 electroporation. *Biotechniques.* 1994;17: 360–365.
62629. Glascock CB, Weickert MJ. Using chromosomal lacI<sup>Q1</sup> to control expression of genes on high-copy-number  
627 plasmids in *Escherichia coli*. *Gene.* 1998;223: 221–231.
62830. Gatti-Lafranconi P, Dijkman WP, Devenish SRA, Hollfelder F. A single mutation in the core domain of the  
629 lac repressor reduces leakiness. *Microb Cell Fact.* 2013;12: 67–76.
63031. Quan J, Tian J. Circular polymerase extension cloning of complex gene libraries and pathways. *PLoS One.*  
631 2009;4: e6441–e6446.
63232. Cormack BP, Valdivia RH, Falkow S. FACS-optimized mutants of the green fluorescent protein (GFP).  
633 *Gene.* 1996;173: 33–38.
63433. Neff NF, Chamberlin MJ. Termination of transcription by *Escherichia coli* ribonucleic acid polymerase in  
635 vitro. Effect of altered reaction conditions and mutations in the enzyme protein on termination with T7 and  
636 T3 deoxyribonucleic acids. *Biochemistry.* 1980;19: 3005–3015.

63734. Prasher DC, Eckenrode VK, Ward WW, Prendergast FG, Cormier MJ. Primary structure of the *Aequorea*  
638 *victoria* green-fluorescent protein. *Gene*. 1992;111: 229–233.
63935. Barondeau DP, Putnam CD, Kassmann CJ, Tainer JA, Getzoff ED. Mechanism and energetics of green  
640 fluorescent protein chromophore synthesis revealed by trapped intermediate structures. *Proc Natl Acad Sci*  
641 *USA*. 2003;100: 12111–12116.
64236. Davey JA, Wilson CJ. Engineered signal-coupled inducible promoters: measuring the apparent RNA-  
643 polymerase resource budget. *Nucleic Acids Res*. 2020;48: 9995–10012.
64437. Simoncsits A, Chen J, Percipalle P, Want S, Törö I, Pongor S. Single-chain repressors containing  
645 engineered DNA-binding domains of the phage 434 repressor recognize symmetric or asymmetric DNA  
646 operators. *J Mol Biol*. 1997;267: 118–131.
64738. Jana R, Hazbun TR, Fields JD, Mossing MC. Single-chain lambda Cro repressors confirm high intrinsic  
648 dimer-DNA affinity. *Biochemistry*. 1998;37: 6446–6455.
64939. Garcia HG, Sanchez A, Boedicker JQ, Osborne M, Gelles J, Kondov J, et al. Operator sequence alters  
650 gene expression independently of transcription factor occupancy in bacteria. *Cell Rep*. 2012;2: 150–161.
65140. Cox RS III, Surette MG, Elowitz MB. Programming gene expression with combinatorial promoters. *Mol Syst*  
652 *Biol*. 2007;3: 145–155.
65341. Clifton KP, Jones EM, Paudel S, Marken JP, Monette CE, Halleran AD, et al. The genetic insulator RiboJ  
654 increases expression of insulated genes. *J Biol Eng*. 2018;12: 23–28.
65542. Lou C, Stanton B, Chen Y-J, Munsky B, Voight CA. Ribozyme-based insulator parts buffer synthetic circuits  
656 from genetic context. *Nat Biotech*. 2012;30: 1137–1142.
65743. Isalan M, Klug A, Choo Y. A rapid, generally applicable method to engineer zinc fingers illustrated by  
658 targeting the HIV-1 promoter. *Nat Biotech*. 2001;19: 656–660.
65944. Pavletich NP, Pabo CO. Zinc finger-DNA recognition: crystal structure of a Zif268-DNA complex at 2.1 Å.  
660 *Science*. 1991;252: 809–817.
66145. Hoover DM, Lubkowski J. DNAWorks: an automated method for designing oligonucleotides for PCR-based  
662 gene synthesis. *Nucleic Acids Res*. 2002;30: e43–e39.
66346. Rouillard J-M, Lee W, Truan G, Gao X, Zhou X, Gulari E. Gene2Oligo: oligonucleotide design for in vitro  
664 gene synthesis. *Nucleic Acids Res*. 2004;32: W176–W180.

66547. Nowak RM, Wojtowicz-Krawiec A, Plucienniczak A. DNASynth: A computer program for assembly of  
666 artificial gene parts in decreasing temperature. *Biomed Res Int.* 2015;2015: 413262–413270.
66748. Lipinszki Z, VERNYIK V, Farago N, Sari T, Puskas LG, Blattner FR, et al. Enhancing the translational capacity  
668 of *E. coli* by resolving the codon bias. *ACS Synth Biol.* 2018;7: 2656–2664.
66949. Chen J, Pongor S, Simoncsits A. Recognition of DNA by single-chain derivatives of the phage 434  
670 repressor: high affinity binding depends on both the contacted and non-contacted base pairs. *Nucleic Acids*  
671 *Res.* 1997;25: 2047–2054.
67250. Simoncsits A, Tjörnhammar ML, Wang S, Pongor S. Single-chain 434 repressors with altered DNA-binding  
673 specificities. Isolation of mutant single-chain repressors by phenotypic screening of combinatorial mutant  
674 libraries. *Genetica.* 1999;106: 85–92.
67551. Lehming N, Sartorius J, Oehler S, von Wilcken-Bergmann B, Müller-Hill B. Recognition helices of lac and  
676 lambda repressor are oriented in opposite directions and recognize similar DNA sequences. *Proc Natl Acad*  
677 *Sci USA.* 1988;85: 7947–7951.



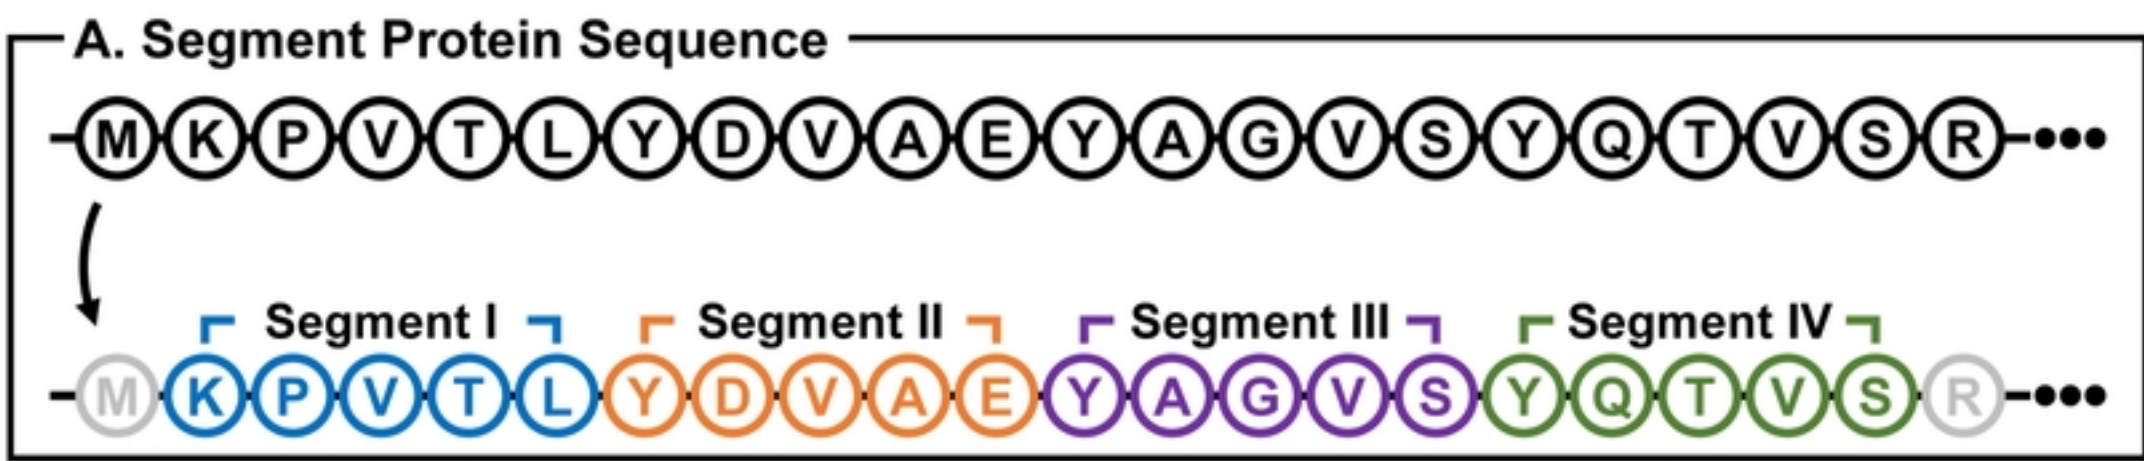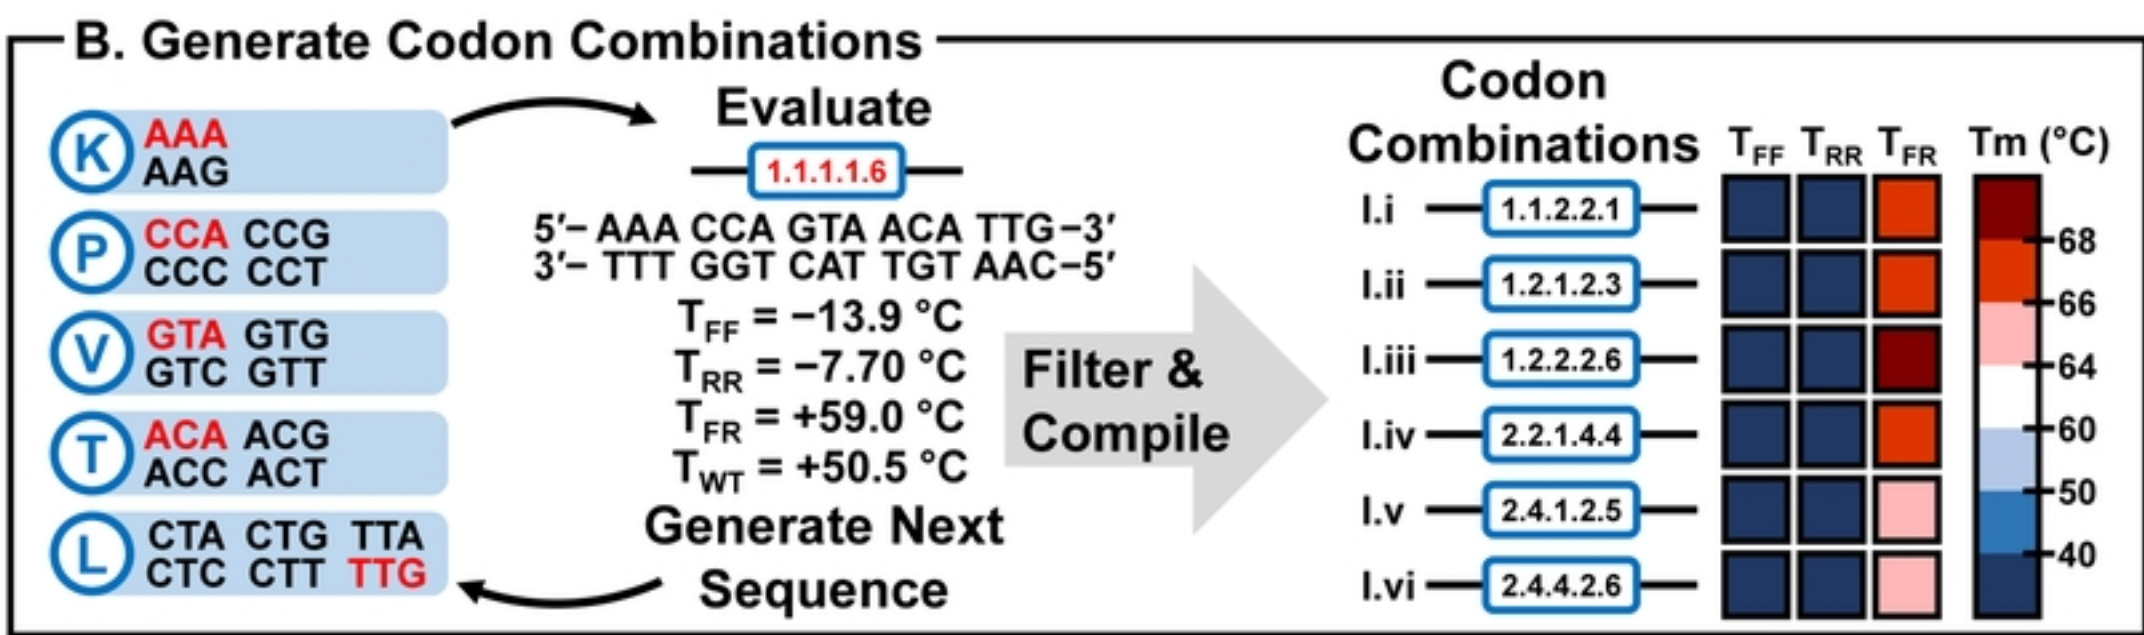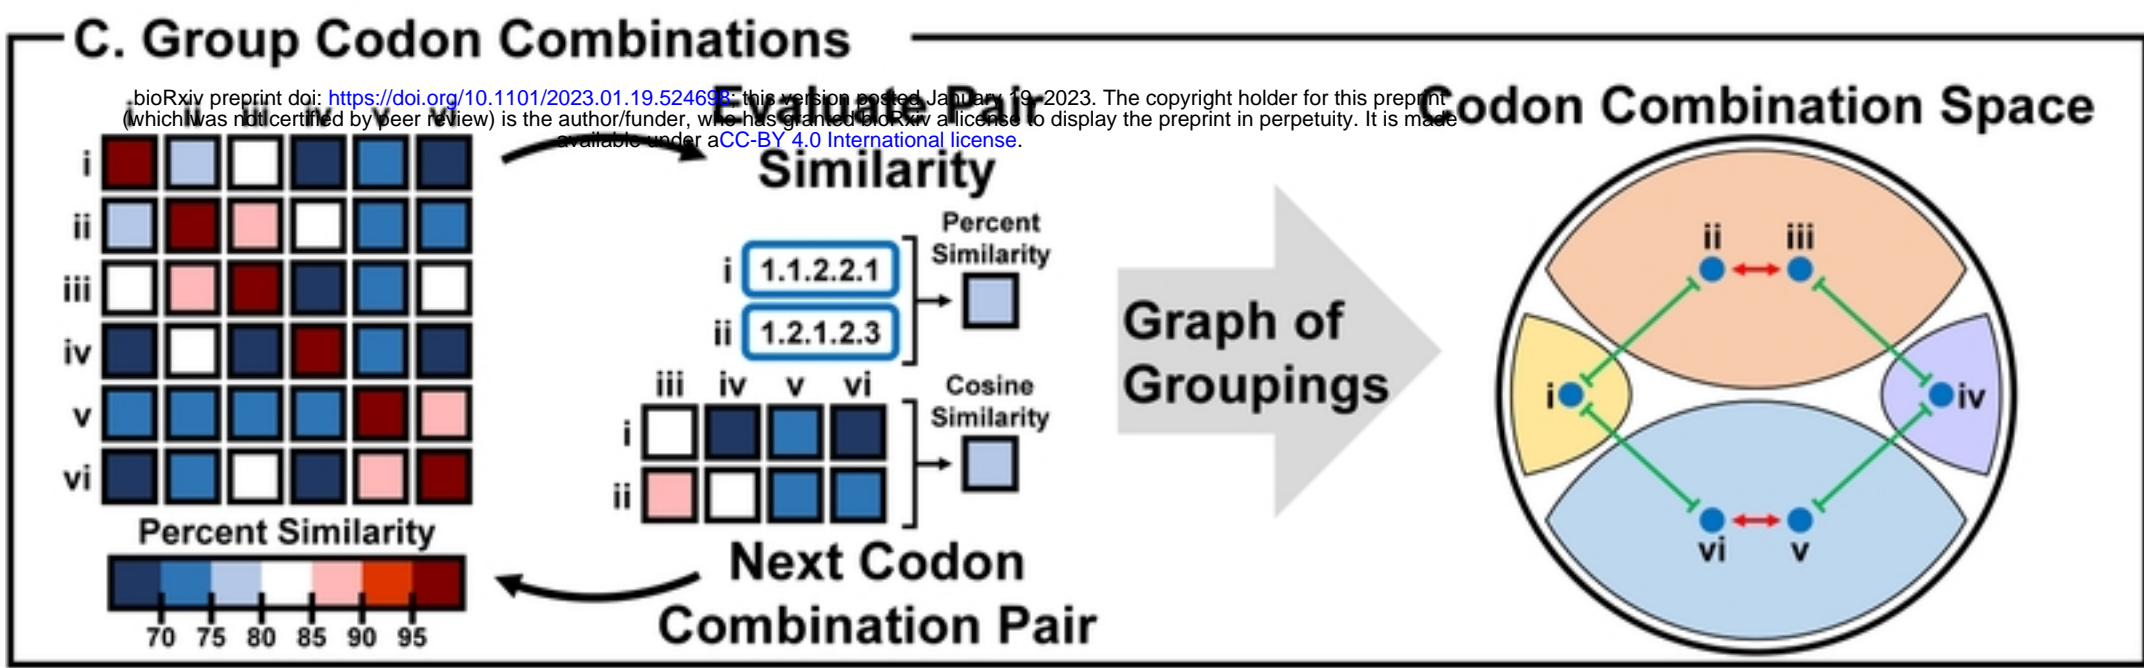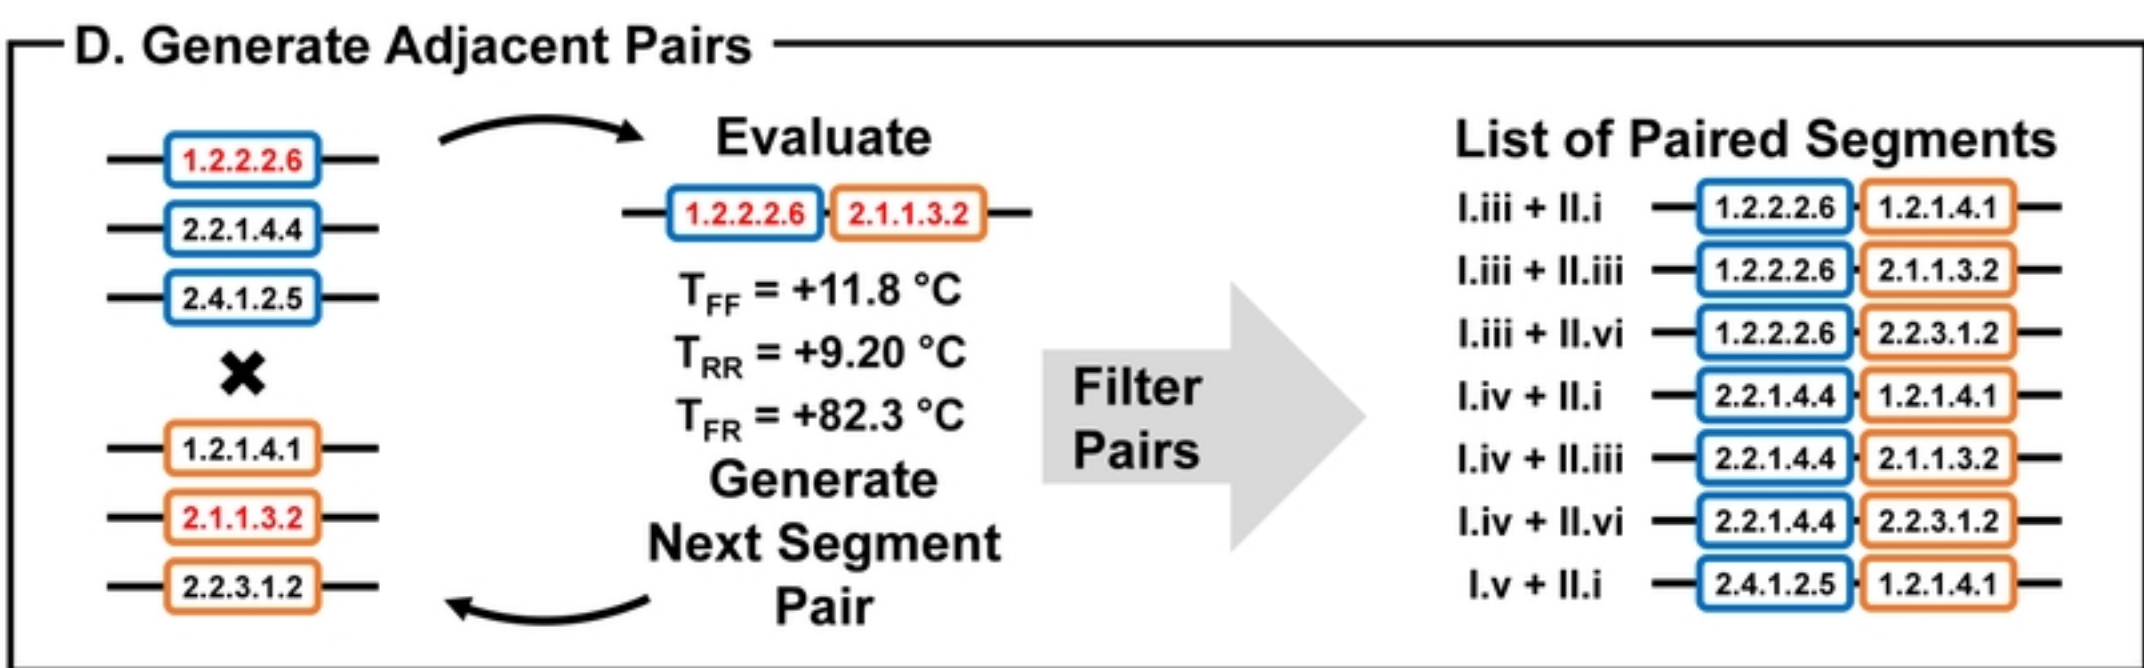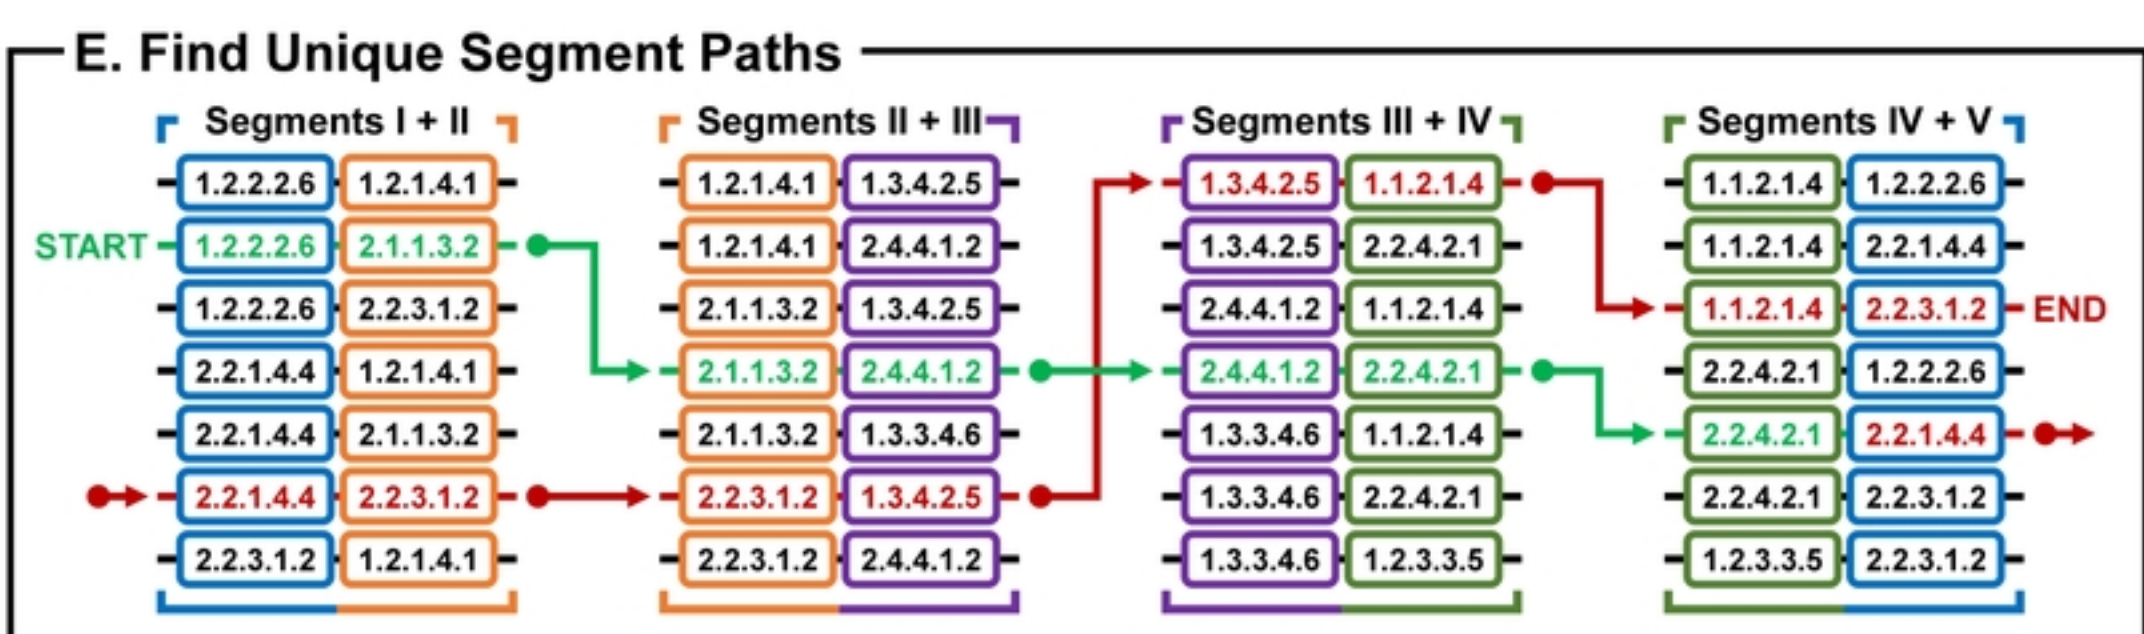

Figure 1

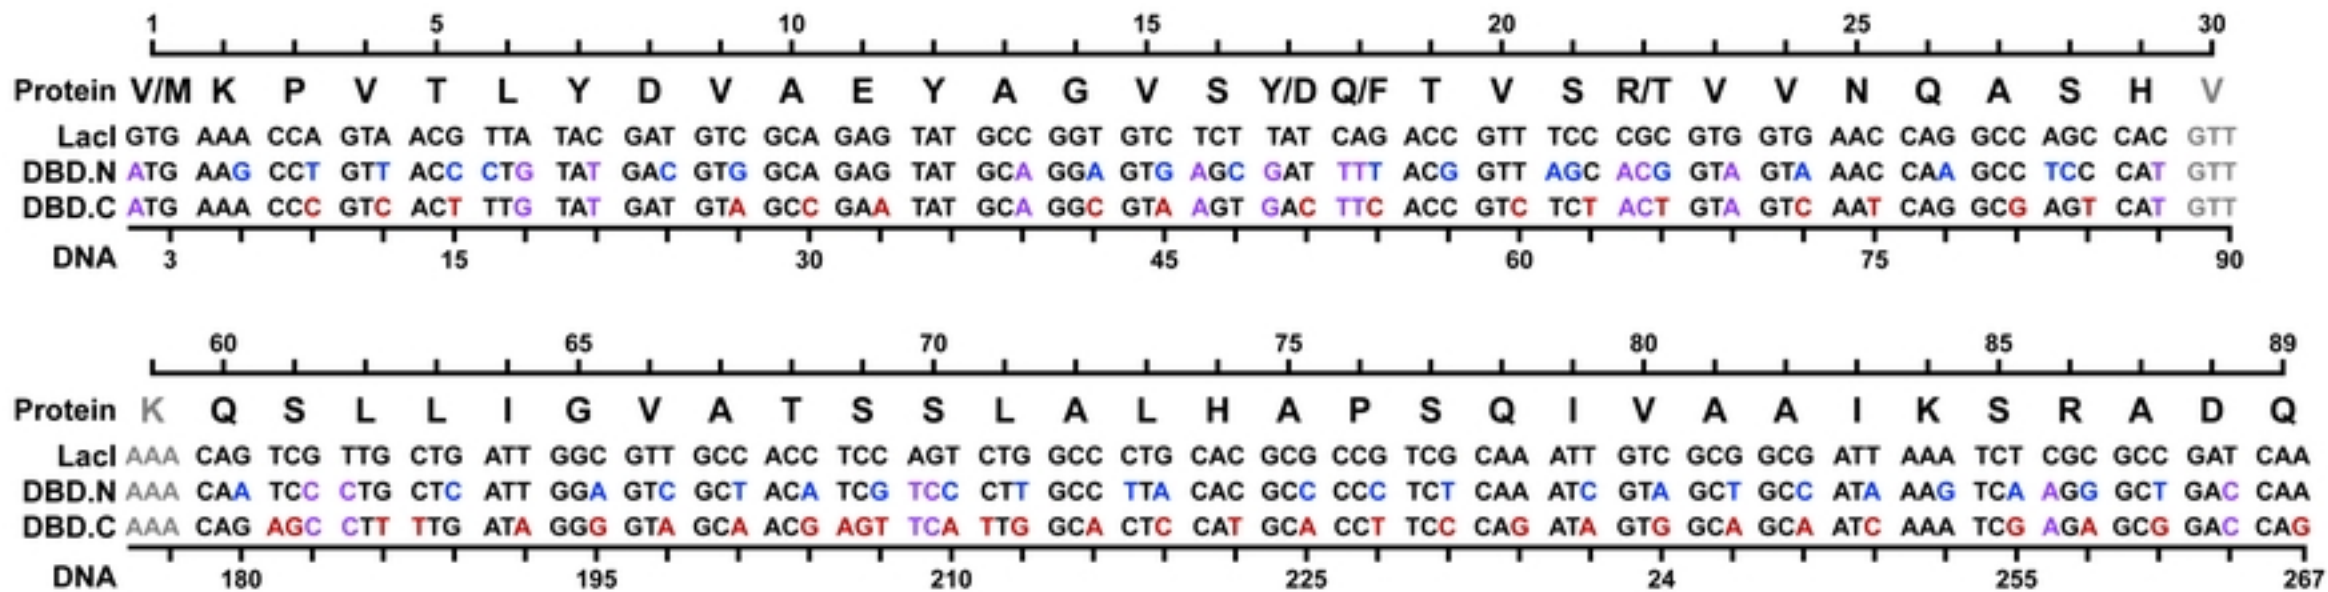

Figure 2



**A.**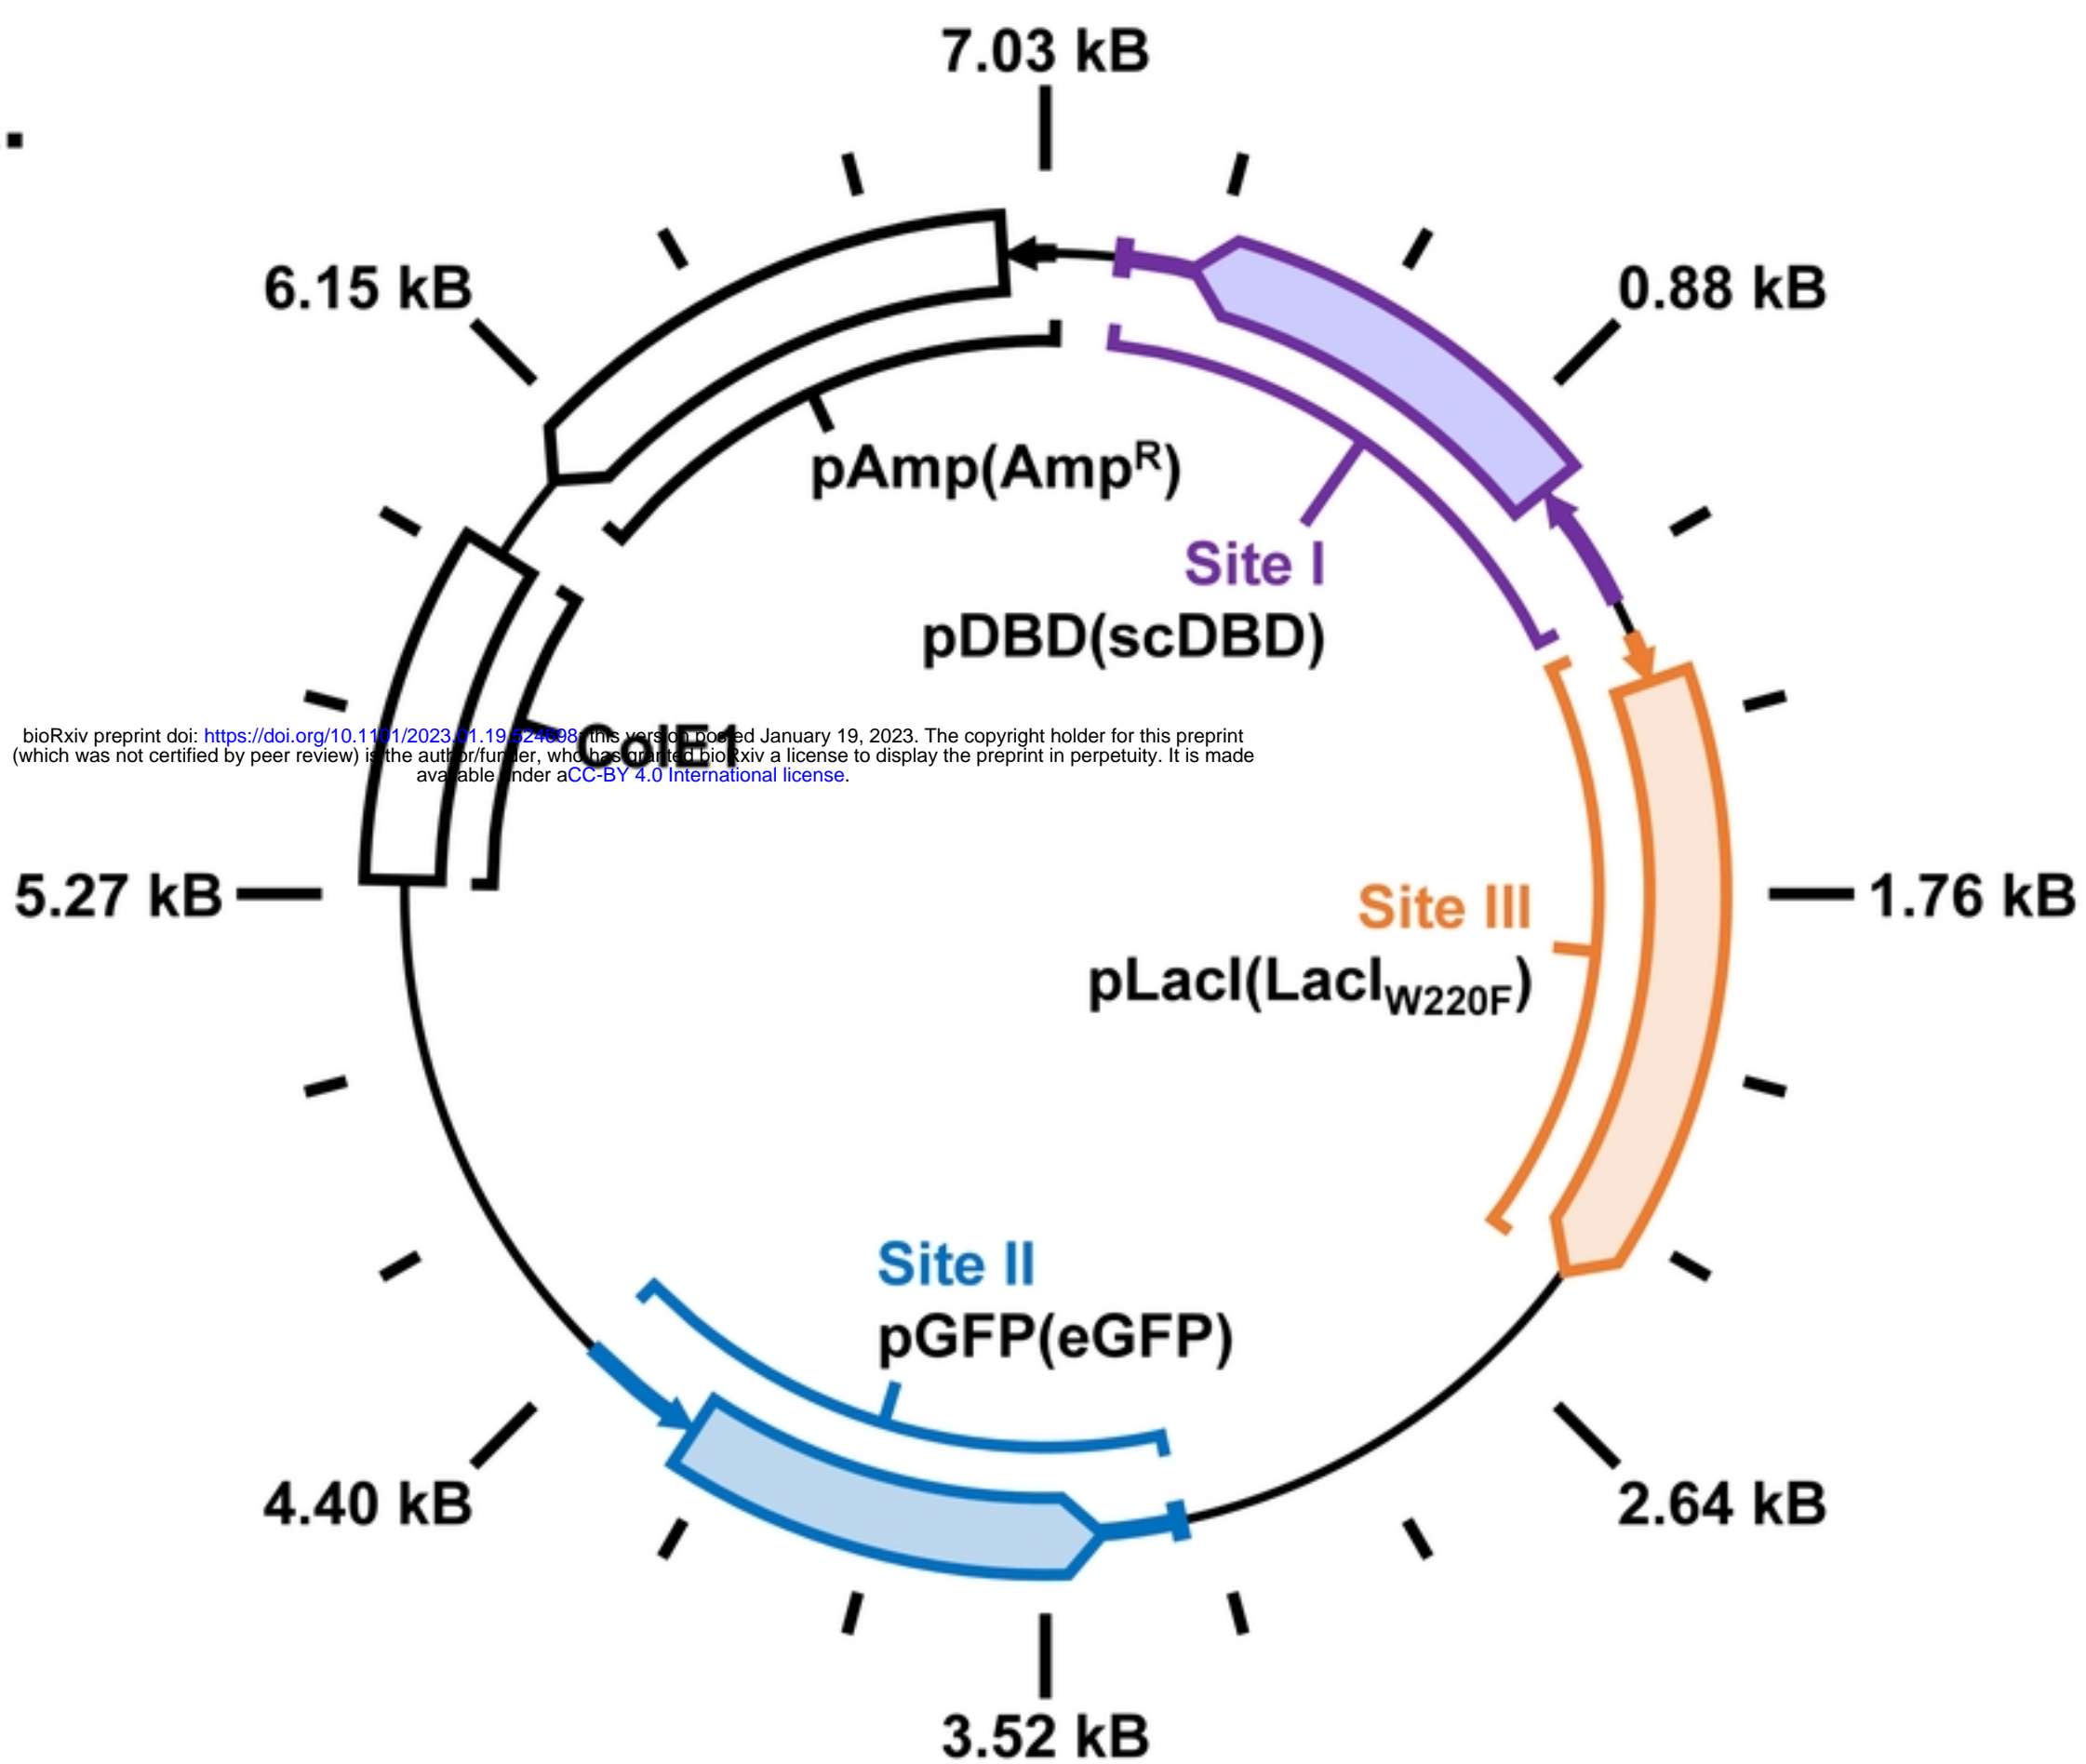**B.**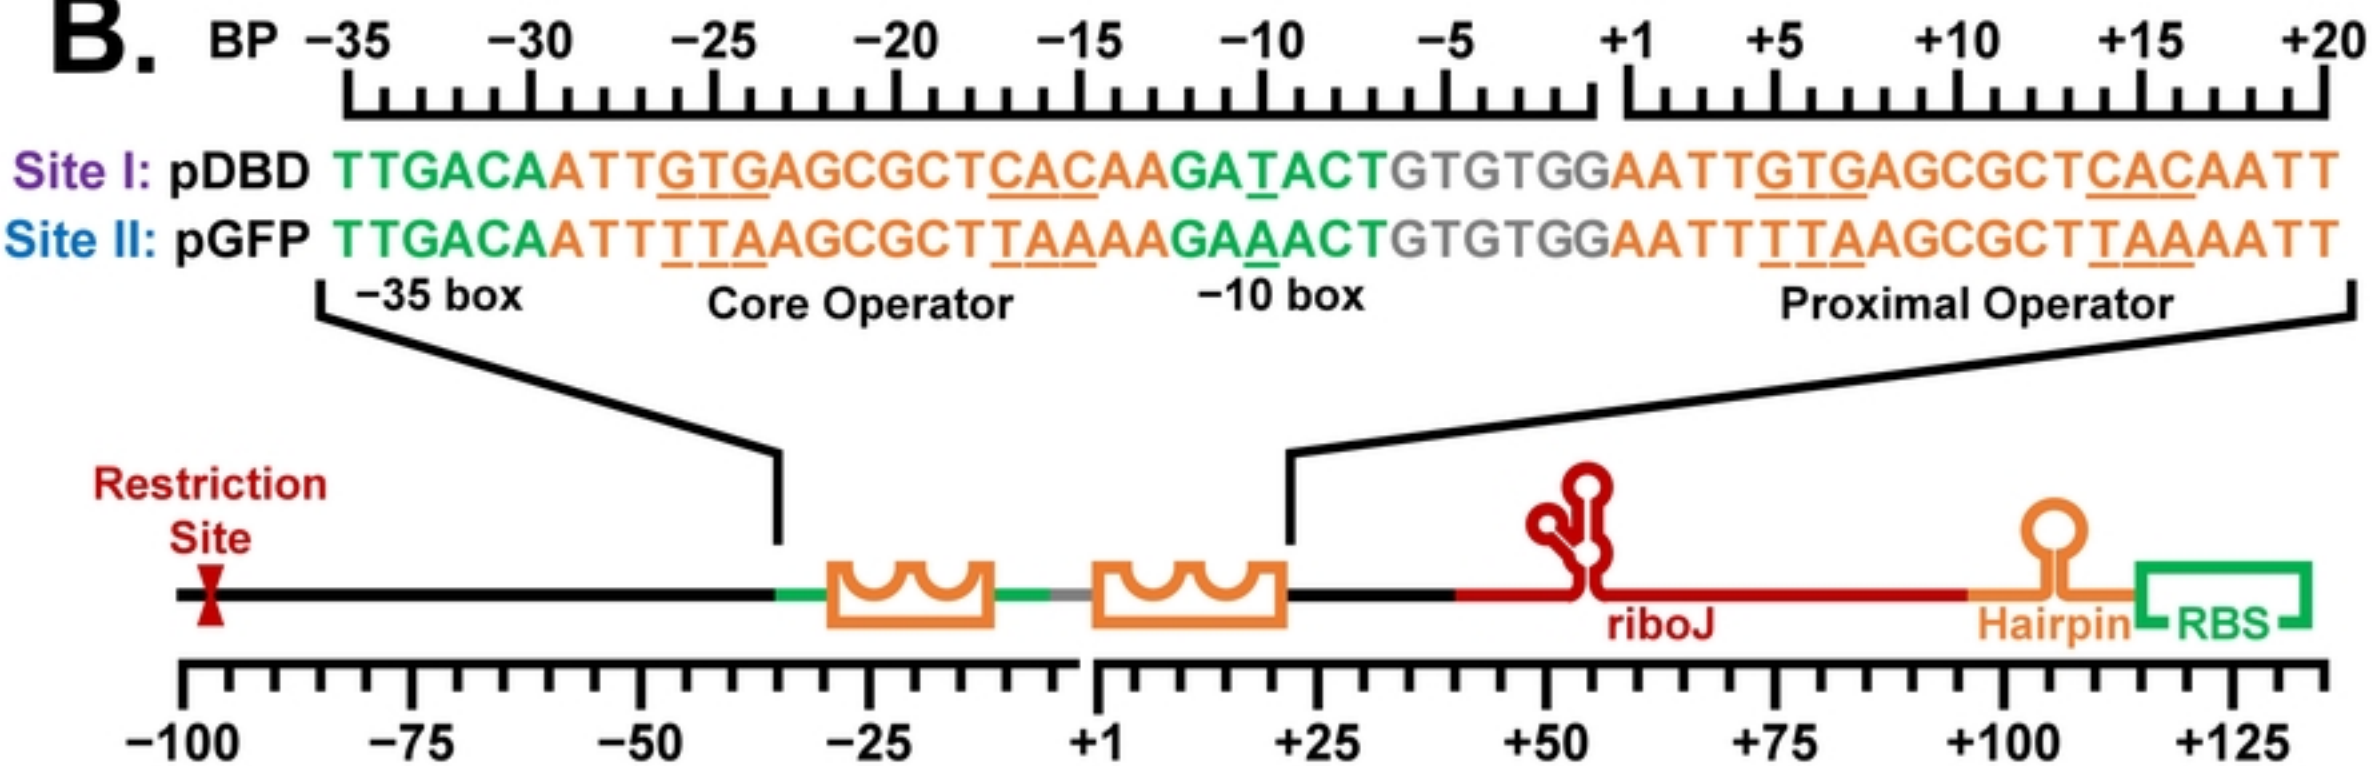

Figure 3



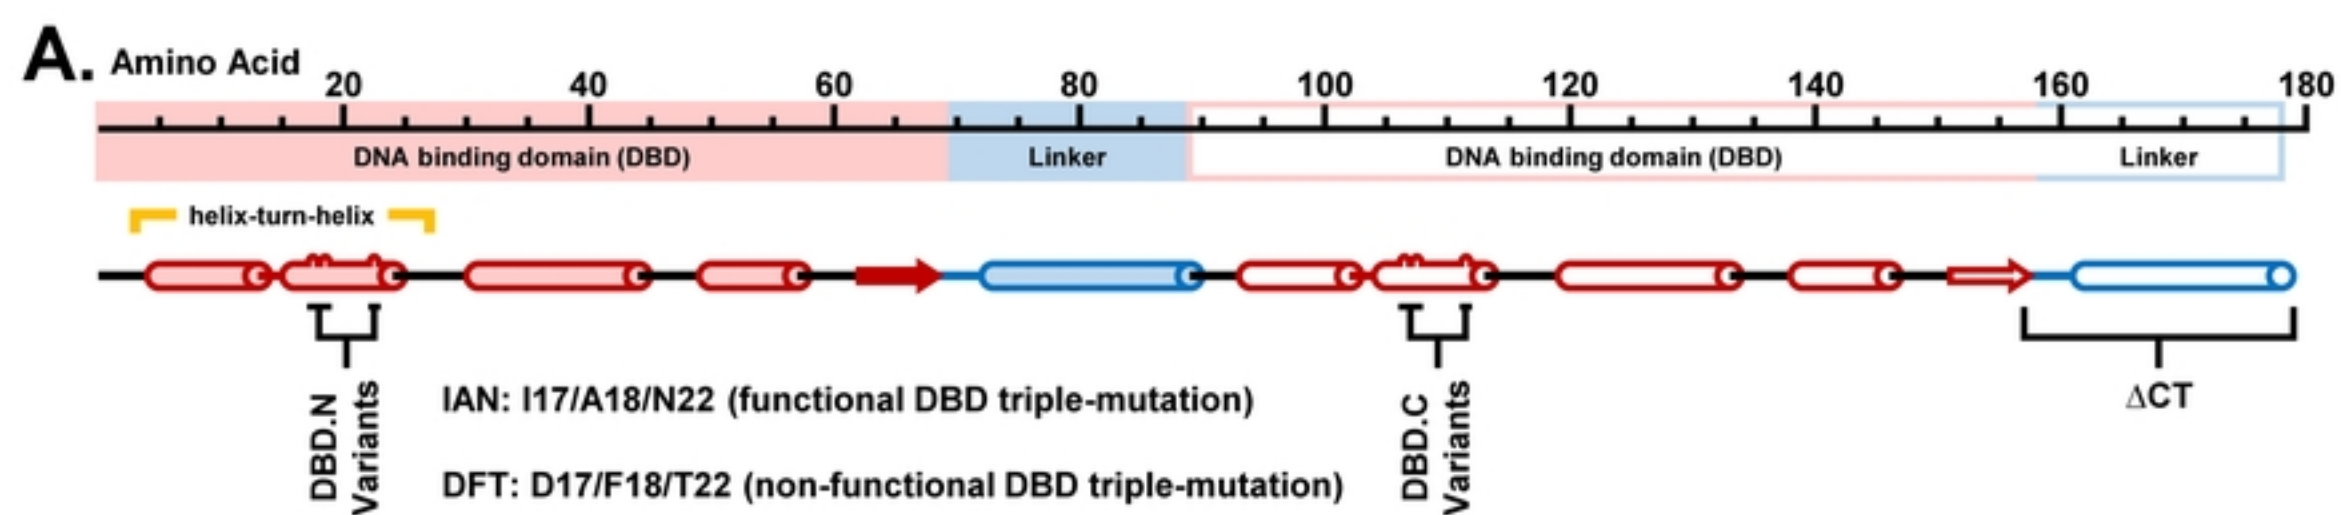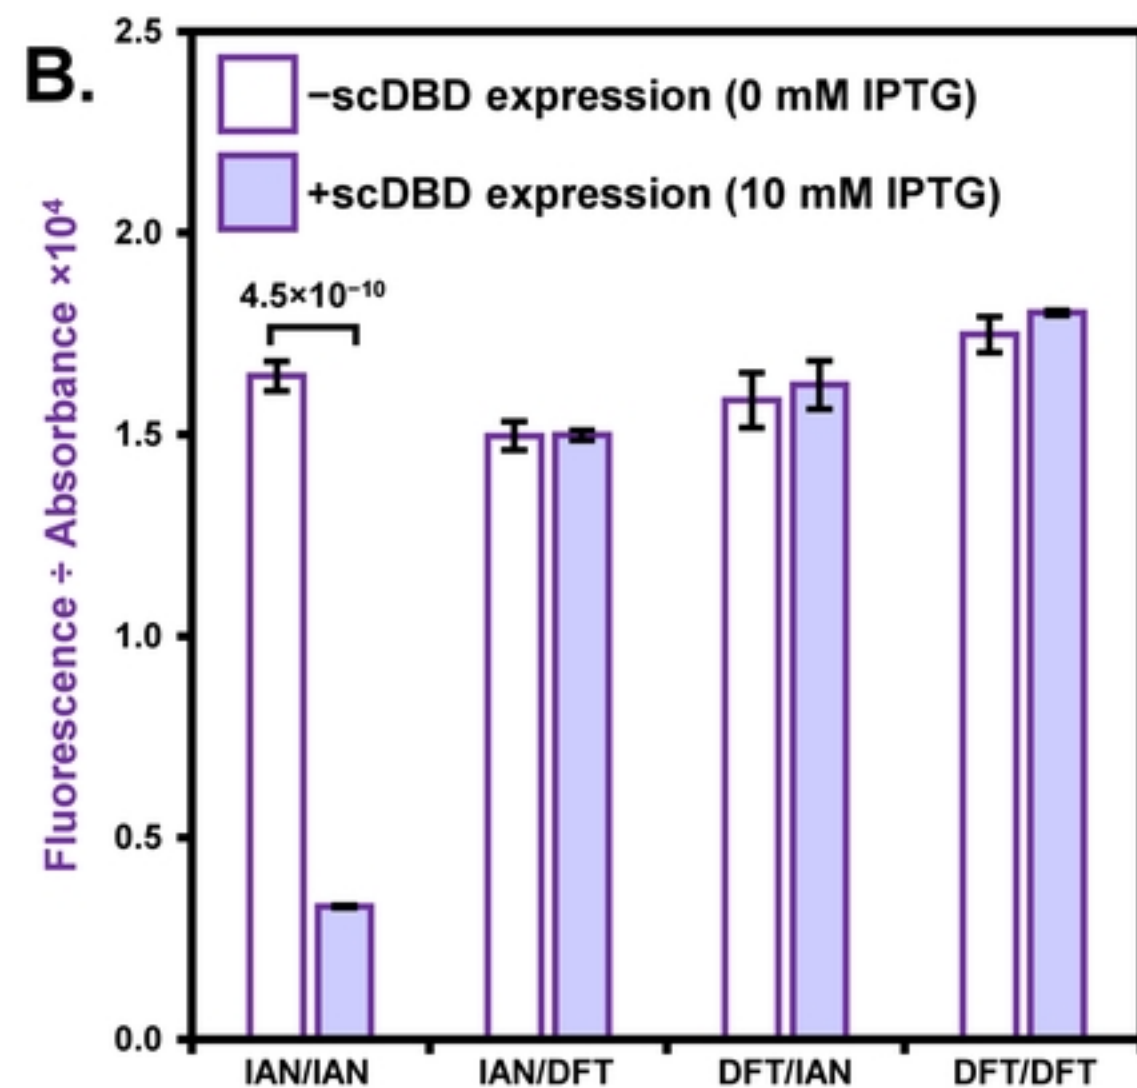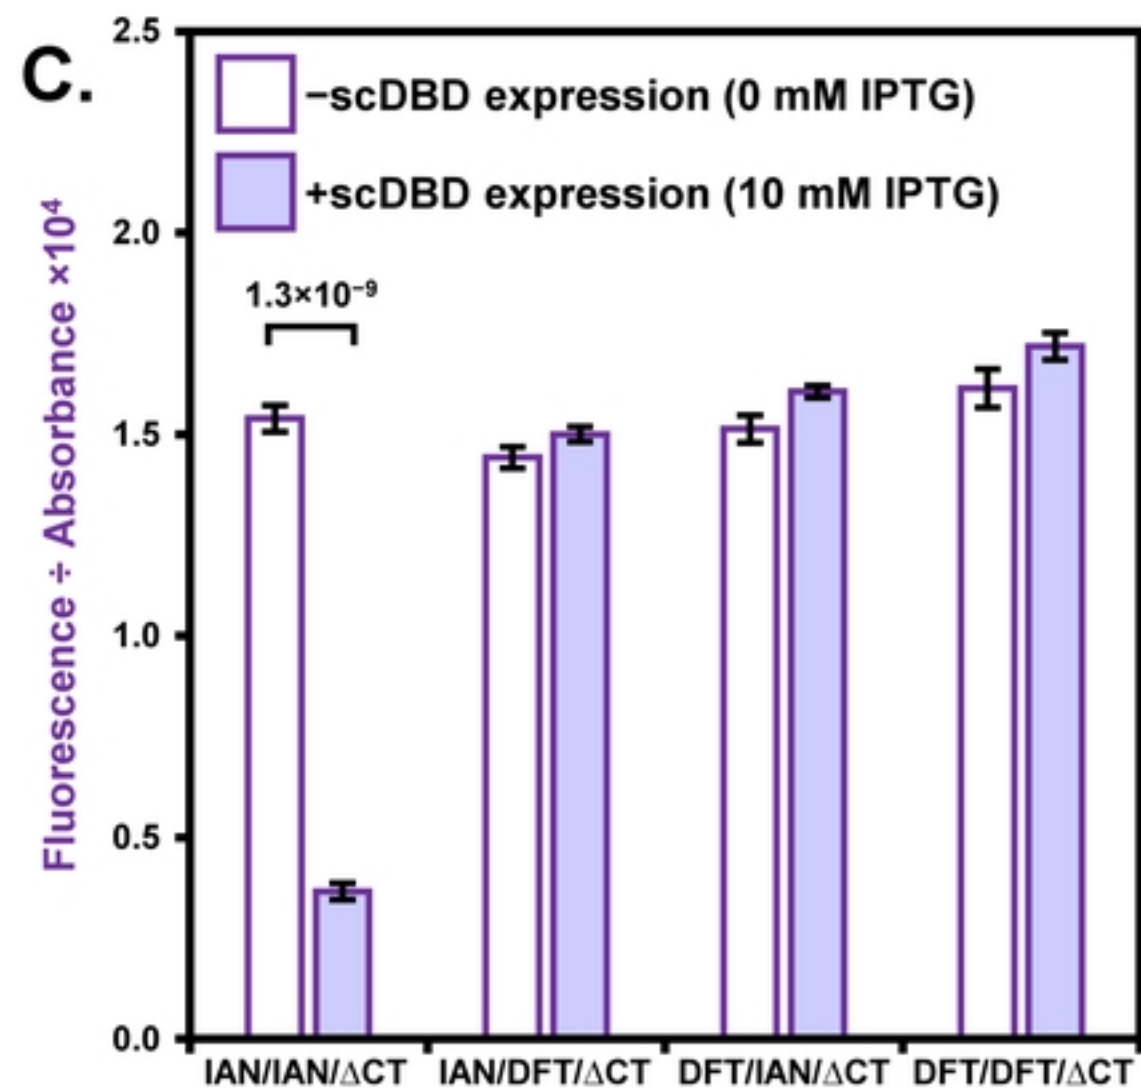

Figure 4
